# Supplementary material for: Environmental Drivers of Bacillus-Positive Blood Cultures in a Cancer Hospital, Sapporo, Japan
Source: PubMed Central journal article supplement (PMC6210759; doi:10.3390/ijerph15102201), 2018-10-09
Supplement: ijerph-15-02201-s001.pdf [file ijerph-15-02201-s001.pdf]

**Table S1.** Climatological variables and incidence in Sapporo from 2013–16.

| Date      | Mean_temperature<br>(Celsius) | Mean_relative<br>_humidity<br>(%) | Absolute_humidity<br>(g/m <sup>3</sup> ) | Mean_speed<br>_of_wind<br>(m/s) | Incidence |
|-----------|-------------------------------|-----------------------------------|------------------------------------------|---------------------------------|-----------|
| 2013/1/1  | -5.6                          | 64                                | 2.084420238                              | 2                               | 0         |
| 2013/1/2  | -4.3                          | 67                                | 2.396800515                              | 3.1                             | 0         |
| 2013/1/3  | -6.4                          | 42                                | 1.290451857                              | 5.2                             | 0         |
| 2013/1/4  | -7.6                          | 54                                | 1.519066681                              | 4.1                             | 0         |
| 2013/1/5  | -4.2                          | 58                                | 2.089779452                              | 3.1                             | 0         |
| 2013/1/6  | -5.9                          | 67                                | 2.135054284                              | 4.2                             | 0         |
| 2013/1/7  | -7.1                          | 58                                | 1.692868735                              | 3.4                             | 0         |
| 2013/1/8  | -7.3                          | 54                                | 1.55307619                               | 2.8                             | 0         |
| 2013/1/9  | -8.2                          | 61                                | 1.641358042                              | 1.9                             | 0         |
| 2013/1/10 | -6.6                          | 52                                | 1.57448828                               | 3.1                             | 0         |
| 2013/1/11 | -6.5                          | 59                                | 1.799565801                              | 3.3                             | 0         |
| 2013/1/12 | -4.5                          | 71                                | 2.503666173                              | 2.3                             | 0         |
| 2013/1/13 | -3.9                          | 57                                | 2.098345277                              | 4.5                             | 0         |
| 2013/1/14 | -5.3                          | 64                                | 2.13025337                               | 1.6                             | 0         |
| 2013/1/15 | -7.1                          | 74                                | 2.159867007                              | 3.2                             | 0         |
| 2013/1/16 | -6.6                          | 70                                | 2.119503454                              | 1.5                             | 0         |
| 2013/1/17 | -8.3                          | 73                                | 1.949700784                              | 1.6                             | 0         |
| 2013/1/18 | -8                            | 74                                | 2.02093941                               | 3.3                             | 0         |
| 2013/1/19 | -2.4                          | 75                                | 3.071450993                              | 5.1                             | 0         |
| 2013/1/20 | -1.1                          | 84                                | 3.768614141                              | 5.8                             | 0         |
| 2013/1/21 | -1.1                          | 79                                | 3.544291871                              | 3.2                             | 0         |
| 2013/1/22 | -2.7                          | 69                                | 2.76645821                               | 1.4                             | 0         |
| 2013/1/23 | -3.9                          | 75                                | 2.760980627                              | 1.3                             | 0         |
| 2013/1/24 | -2.6                          | 72                                | 2.90722948                               | 4.3                             | 0         |
| 2013/1/25 | -1                            | 67                                | 3.026957298                              | 4.9                             | 0         |
| 2013/1/26 | -4.9                          | 59                                | 2.021430879                              | 3.2                             | 0         |
| 2013/1/27 | -2.3                          | 77                                | 3.175680298                              | 6.8                             | 0         |
| 2013/1/28 | -4.3                          | 72                                | 2.575666226                              | 1.5                             | 0         |
| 2013/1/29 | -4.5                          | 78                                | 2.7505065                                | 2.8                             | 0         |
| 2013/1/30 | -1                            | 79                                | 3.569098904                              | 5.8                             | 0         |
| 2013/1/31 | -0.8                          | 79                                | 3.619169118                              | 1.5                             | 0         |
| 2013/2/1  | 1.7                           | 72                                | 3.91798871                               | 4.4                             | 0         |
| 2013/2/2  | 1.2                           | 64                                | 3.365813153                              | 5.9                             | 0         |
| 2013/2/3  | -5.8                          | 62                                | 1.990149392                              | 5.2                             | 0         |
| 2013/2/4  | -3.1                          | 72                                | 2.806036622                              | 2.4                             | 0         |
| 2013/2/5  | -4.9                          | 56                                | 1.918646258                              | 6.1                             | 0         |
| 2013/2/6  | -4.1                          | 61                                | 2.2136804                                | 1.3                             | 0         |
| 2013/2/7  | -3.5                          | 77                                | 2.916715007                              | 4.4                             | 0         |
| 2013/2/8  | -2.5                          | 78                                | 3.17183451                               | 6.8                             | 0         |
| 2013/2/9  | -4.7                          | 73                                | 2.537411332                              | 4.4                             | 0         |
| 2013/2/10 | -5.8                          | 70                                | 2.246942861                              | 1.7                             | 0         |
| 2013/2/11 | -6.1                          | 71                                | 2.229791668                              | 1.6                             | 0         |
| 2013/2/12 | -6                            | 72                                | 2.277738871                              | 1.9                             | 0         |
| 2013/2/13 | -3.8                          | 70                                | 2.595401375                              | 1.8                             | 0         |

|           |      |    |             |     |   |
|-----------|------|----|-------------|-----|---|
| 2013/2/14 | -2.4 | 82 | 3.358119753 | 1.3 | 0 |
| 2013/2/15 | -3.3 | 61 | 2.343782604 | 3   | 0 |
| 2013/2/16 | -5.7 | 77 | 2.489669938 | 2.8 | 0 |
| 2013/2/17 | -5.9 | 69 | 2.198787248 | 3.2 | 0 |
| 2013/2/18 | -5.3 | 82 | 2.729387131 | 2   | 0 |
| 2013/2/19 | -4   | 75 | 2.74129785  | 2.3 | 0 |
| 2013/2/20 | -6.4 | 58 | 1.782052564 | 3.7 | 0 |
| 2013/2/21 | -5.4 | 59 | 1.9496535   | 4.1 | 0 |
| 2013/2/22 | -5   | 62 | 2.108938166 | 2.3 | 0 |
| 2013/2/23 | -5.3 | 58 | 1.930542117 | 3.3 | 0 |
| 2013/2/24 | -6.9 | 77 | 2.280714262 | 2   | 0 |
| 2013/2/25 | -5.8 | 71 | 2.279042045 | 2.5 | 0 |
| 2013/2/26 | -3.4 | 54 | 2.060110436 | 2.8 | 0 |
| 2013/2/27 | -0.3 | 65 | 3.083009567 | 4.6 | 0 |
| 2013/2/28 | 0.8  | 69 | 3.530664303 | 3.7 | 0 |
| 2013/3/1  | 0.6  | 79 | 3.987196311 | 5.9 | 0 |
| 2013/3/2  | -0.8 | 78 | 3.573356851 | 9   | 0 |
| 2013/3/3  | -2.6 | 73 | 2.947607667 | 6.7 | 0 |
| 2013/3/4  | -2.7 | 77 | 3.087206988 | 2   | 0 |
| 2013/3/5  | -0.6 | 66 | 3.065952958 | 1.7 | 0 |
| 2013/3/6  | 0.3  | 71 | 3.510178992 | 4.2 | 0 |
| 2013/3/7  | 0.6  | 76 | 3.835783793 | 5.1 | 0 |
| 2013/3/8  | 1.4  | 76 | 4.051907839 | 3.3 | 0 |
| 2013/3/9  | -5.4 | 72 | 2.379238169 | 6.7 | 0 |
| 2013/3/10 | -4   | 69 | 2.521994022 | 6.2 | 0 |
| 2013/3/11 | -3.7 | 61 | 2.277917461 | 4   | 0 |
| 2013/3/12 | 2.7  | 65 | 3.78524952  | 2.8 | 0 |
| 2013/3/13 | 2    | 84 | 4.665215808 | 4.5 | 0 |
| 2013/3/14 | -3.2 | 56 | 2.167023143 | 4.6 | 0 |
| 2013/3/15 | 1.5  | 59 | 3.167102403 | 3.4 | 0 |
| 2013/3/16 | -0.8 | 72 | 3.298483247 | 4.9 | 0 |
| 2013/3/17 | 0.8  | 58 | 2.967804777 | 4.2 | 0 |
| 2013/3/18 | 4.8  | 76 | 5.093601249 | 4.8 | 0 |
| 2013/3/19 | 3.4  | 64 | 3.906847518 | 3.6 | 0 |
| 2013/3/20 | -0.4 | 74 | 3.485640026 | 3.9 | 0 |
| 2013/3/21 | -4   | 66 | 2.412342108 | 5.5 | 0 |
| 2013/3/22 | -0.1 | 70 | 3.366457338 | 4.1 | 0 |
| 2013/3/23 | -1.7 | 55 | 2.366109507 | 3.5 | 0 |
| 2013/3/24 | 0.1  | 56 | 2.730651181 | 2.4 | 0 |
| 2013/3/25 | -0.1 | 58 | 2.789350366 | 1.9 | 0 |
| 2013/3/26 | 0.4  | 66 | 3.285544184 | 3.3 | 0 |
| 2013/3/27 | 2.8  | 54 | 3.165964662 | 5.3 | 0 |
| 2013/3/28 | 4.6  | 80 | 5.290978318 | 4   | 0 |
| 2013/3/29 | 2.4  | 60 | 3.423921878 | 2.4 | 0 |
| 2013/3/30 | 1    | 60 | 3.11254098  | 2.8 | 0 |
| 2013/3/31 | 1.3  | 52 | 2.753484416 | 2.3 | 0 |
| 2013/4/1  | 3.2  | 48 | 2.89103276  | 3.2 | 0 |
| 2013/4/2  | 5.2  | 64 | 4.404459646 | 2.7 | 0 |
| 2013/4/3  | 6.9  | 74 | 5.693662883 | 3.8 | 0 |
| 2013/4/4  | 5.9  | 56 | 4.035842022 | 4   | 0 |

|           |      |    |             |      |   |
|-----------|------|----|-------------|------|---|
| 2013/4/5  | 4.6  | 58 | 3.83595928  | 2.1  | 0 |
| 2013/4/6  | 7.4  | 65 | 5.166430185 | 6.7  | 0 |
| 2013/4/7  | 9.3  | 90 | 8.084009038 | 5.4  | 0 |
| 2013/4/8  | 5.3  | 61 | 4.225827026 | 7.9  | 0 |
| 2013/4/9  | 5.4  | 59 | 4.114344717 | 5.5  | 0 |
| 2013/4/10 | 4.8  | 59 | 3.954243075 | 3.3  | 0 |
| 2013/4/11 | 4.5  | 60 | 3.94194791  | 3.1  | 0 |
| 2013/4/12 | 3.1  | 71 | 4.247652863 | 2.7  | 0 |
| 2013/4/13 | 6.4  | 52 | 3.872455818 | 2.8  | 0 |
| 2013/4/14 | 8.3  | 68 | 5.728589682 | 7.6  | 0 |
| 2013/4/15 | 5.7  | 46 | 3.271841476 | 3.5  | 0 |
| 2013/4/16 | 6.7  | 51 | 3.873170653 | 3.4  | 0 |
| 2013/4/17 | 4.4  | 81 | 5.286348908 | 4.1  | 0 |
| 2013/4/18 | 4.9  | 71 | 4.790145421 | 3.5  | 0 |
| 2013/4/19 | 3.4  | 76 | 4.639381428 | 4.3  | 0 |
| 2013/4/20 | 5.5  | 57 | 4.00117797  | 3    | 0 |
| 2013/4/21 | 7.1  | 49 | 3.819531774 | 4    | 0 |
| 2013/4/22 | 8.6  | 45 | 3.864821874 | 4.4  | 0 |
| 2013/4/23 | 10.7 | 45 | 4.417651677 | 2.6  | 0 |
| 2013/4/24 | 9.7  | 59 | 5.436374744 | 5.7  | 0 |
| 2013/4/25 | 8.8  | 64 | 5.567634085 | 4.4  | 0 |
| 2013/4/26 | 8.6  | 72 | 6.183714998 | 4.3  | 0 |
| 2013/4/27 | 7    | 83 | 6.427858735 | 6.3  | 0 |
| 2013/4/28 | 5.4  | 81 | 5.648507154 | 10.4 | 0 |
| 2013/4/29 | 5.8  | 80 | 5.727715977 | 6.2  | 0 |
| 2013/4/30 | 5.1  | 81 | 5.537656592 | 4.1  | 0 |
| 2013/5/1  | 5.5  | 79 | 5.545492274 | 2.3  | 0 |
| 2013/5/2  | 4.6  | 71 | 4.695743257 | 6.5  | 0 |
| 2013/5/3  | 4.6  | 84 | 5.555527234 | 3.8  | 0 |
| 2013/5/4  | 5.9  | 86 | 6.197900249 | 2.1  | 0 |
| 2013/5/5  | 7.8  | 79 | 6.443996415 | 1.7  | 0 |
| 2013/5/6  | 6    | 81 | 5.876021481 | 3.2  | 1 |
| 2013/5/7  | 5    | 56 | 3.803250451 | 6.2  | 0 |
| 2013/5/8  | 7.8  | 55 | 4.486326618 | 5.8  | 0 |
| 2013/5/9  | 11.2 | 61 | 6.179935127 | 2.9  | 0 |
| 2013/5/10 | 12.9 | 57 | 6.421000382 | 4.6  | 0 |
| 2013/5/11 | 9.8  | 77 | 7.140203614 | 8.1  | 0 |
| 2013/5/12 | 10.7 | 79 | 7.755432943 | 2.8  | 0 |
| 2013/5/13 | 8.7  | 76 | 6.569292513 | 6    | 0 |
| 2013/5/14 | 10.3 | 79 | 7.561795499 | 2.6  | 0 |
| 2013/5/15 | 9.6  | 80 | 7.324577136 | 4.4  | 0 |
| 2013/5/16 | 9.7  | 84 | 7.739923365 | 4.2  | 0 |
| 2013/5/17 | 12.1 | 69 | 7.395641968 | 2.6  | 0 |
| 2013/5/18 | 12.8 | 70 | 7.836705839 | 2.1  | 0 |
| 2013/5/19 | 12.8 | 67 | 7.500847017 | 3.1  | 0 |
| 2013/5/20 | 12.7 | 78 | 8.678317818 | 4.5  | 0 |
| 2013/5/21 | 14.7 | 69 | 8.682844066 | 3    | 0 |
| 2013/5/22 | 13   | 81 | 9.181274547 | 2.6  | 0 |
| 2013/5/23 | 9.7  | 90 | 8.292775034 | 4.6  | 0 |
| 2013/5/24 | 10   | 74 | 6.949757846 | 4.7  | 0 |

|           |      |    |             |      |   |
|-----------|------|----|-------------|------|---|
| 2013/5/25 | 13.3 | 66 | 7.62112257  | 2.7  | 0 |
| 2013/5/26 | 16.4 | 61 | 8.509616855 | 4.8  | 0 |
| 2013/5/27 | 19.6 | 54 | 9.111357458 | 2.8  | 0 |
| 2013/5/28 | 20   | 60 | 10.36376522 | 5.6  | 0 |
| 2013/5/29 | 15.3 | 78 | 10.18072575 | 7.6  | 0 |
| 2013/5/30 | 16.9 | 71 | 10.20675652 | 4.9  | 0 |
| 2013/5/31 | 20.7 | 52 | 9.356231939 | 2.8  | 0 |
| 2013/6/1  | 20   | 56 | 9.672847543 | 3.1  | 0 |
| 2013/6/2  | 16.6 | 69 | 9.742161449 | 3.4  | 0 |
| 2013/6/3  | 13.3 | 76 | 8.775838111 | 5.2  | 0 |
| 2013/6/4  | 13   | 74 | 8.387831068 | 5    | 0 |
| 2013/6/5  | 13.2 | 79 | 9.066060844 | 2.6  | 0 |
| 2013/6/6  | 14.8 | 78 | 9.875478145 | 2.5  | 0 |
| 2013/6/7  | 18.1 | 64 | 9.883536495 | 2    | 0 |
| 2013/6/8  | 19.5 | 59 | 9.896735733 | 2.5  | 0 |
| 2013/6/9  | 17.1 | 73 | 10.62079766 | 3.6  | 0 |
| 2013/6/10 | 18.4 | 72 | 11.31862185 | 2.4  | 0 |
| 2013/6/11 | 20   | 67 | 11.57287117 | 3.7  | 0 |
| 2013/6/12 | 18.8 | 66 | 10.623822   | 5.7  | 0 |
| 2013/6/13 | 20.8 | 69 | 12.48738965 | 5.6  | 0 |
| 2013/6/14 | 20.6 | 84 | 15.02622758 | 1.4  | 0 |
| 2013/6/15 | 20   | 87 | 15.02745958 | 2.7  | 0 |
| 2013/6/16 | 19.8 | 83 | 14.16967864 | 2.1  | 0 |
| 2013/6/17 | 18.9 | 79 | 12.79168376 | 4.8  | 0 |
| 2013/6/18 | 18.5 | 81 | 12.80908574 | 3.8  | 0 |
| 2013/6/19 | 18.3 | 86 | 13.4395698  | 2.7  | 0 |
| 2013/6/20 | 15.9 | 87 | 11.77597805 | 5    | 0 |
| 2013/6/21 | 15   | 84 | 10.76558285 | 2.1  | 0 |
| 2013/6/22 | 14.8 | 89 | 11.26817378 | 2    | 0 |
| 2013/6/23 | 18.6 | 70 | 11.13527991 | 2.1  | 0 |
| 2013/6/24 | 19.8 | 73 | 12.46248844 | 2.7  | 0 |
| 2013/6/25 | 20.2 | 75 | 13.10701602 | 2.2  | 0 |
| 2013/6/26 | 18.8 | 81 | 13.03832701 | 2.6  | 0 |
| 2013/6/27 | 15.3 | 91 | 11.87751338 | 2.1  | 0 |
| 2013/6/28 | 15.6 | 76 | 10.10192631 | 3.3  | 0 |
| 2013/6/29 | 16.4 | 69 | 9.62563218  | 3.2  | 0 |
| 2013/6/30 | 18.9 | 69 | 11.17248328 | 3.6  | 0 |
| 2013/7/1  | 21.9 | 70 | 13.50088137 | 2.9  | 0 |
| 2013/7/2  | 22.5 | 70 | 13.97453635 | 4.7  | 1 |
| 2013/7/3  | 18.9 | 85 | 13.76320404 | 11.1 | 0 |
| 2013/7/4  | 21.1 | 80 | 14.73245967 | 6.4  | 0 |
| 2013/7/5  | 22.3 | 83 | 16.38074476 | 4    | 0 |
| 2013/7/6  | 23.2 | 80 | 16.62304028 | 1.6  | 0 |
| 2013/7/7  | 23.9 | 78 | 16.86552767 | 2.2  | 0 |
| 2013/7/8  | 24.5 | 74 | 16.55299696 | 2.7  | 0 |
| 2013/7/9  | 26.1 | 76 | 18.59622812 | 2.7  | 0 |
| 2013/7/10 | 23.1 | 84 | 17.35492145 | 2.8  | 0 |
| 2013/7/11 | 22.3 | 77 | 15.19659454 | 1.8  | 0 |
| 2013/7/12 | 21.8 | 76 | 14.57386783 | 1.8  | 0 |
| 2013/7/13 | 22.6 | 70 | 14.05485419 | 2.2  | 0 |

|           |      |    |             |     |   |
|-----------|------|----|-------------|-----|---|
| 2013/7/14 | 22.4 | 74 | 14.68859209 | 2.5 | 0 |
| 2013/7/15 | 22.8 | 76 | 15.43525608 | 2.8 | 0 |
| 2013/7/16 | 22.4 | 79 | 15.68106452 | 2.5 | 0 |
| 2013/7/17 | 20.7 | 73 | 13.13471022 | 5   | 0 |
| 2013/7/18 | 20.6 | 63 | 11.26967069 | 4.5 | 0 |
| 2013/7/19 | 21   | 69 | 12.63326134 | 2.3 | 0 |
| 2013/7/20 | 22.1 | 71 | 13.85230814 | 2.2 | 0 |
| 2013/7/21 | 23   | 63 | 12.94210281 | 3.1 | 0 |
| 2013/7/22 | 21.9 | 73 | 14.07949057 | 4.1 | 0 |
| 2013/7/23 | 24   | 67 | 14.56939736 | 2.7 | 0 |
| 2013/7/24 | 22.7 | 75 | 15.1452528  | 6.3 | 0 |
| 2013/7/25 | 18.7 | 80 | 12.80150401 | 7.5 | 0 |
| 2013/7/26 | 22.2 | 74 | 14.52086161 | 7.5 | 0 |
| 2013/7/27 | 21.6 | 77 | 14.59621574 | 7.2 | 0 |
| 2013/7/28 | 22.2 | 81 | 15.89445662 | 4.9 | 0 |
| 2013/7/29 | 23.1 | 84 | 17.35492145 | 4.1 | 0 |
| 2013/7/30 | 25.3 | 73 | 17.08096077 | 3.9 | 0 |
| 2013/7/31 | 25.1 | 72 | 16.65893936 | 3   | 0 |
| 2013/8/1  | 23.1 | 81 | 16.73510283 | 2.2 | 0 |
| 2013/8/2  | 21.4 | 77 | 14.42848007 | 3.3 | 0 |
| 2013/8/3  | 20.8 | 75 | 13.57324962 | 3.2 | 0 |
| 2013/8/4  | 22   | 70 | 13.57884948 | 2.2 | 0 |
| 2013/8/5  | 23.2 | 71 | 14.75294825 | 5.6 | 0 |
| 2013/8/6  | 26.3 | 75 | 18.55705089 | 4.3 | 0 |
| 2013/8/7  | 25.5 | 80 | 18.92981365 | 2.4 | 0 |
| 2013/8/8  | 25.9 | 75 | 18.14798937 | 2.2 | 0 |
| 2013/8/9  | 23.2 | 88 | 18.28534431 | 6.2 | 0 |
| 2013/8/10 | 23.9 | 86 | 18.59532538 | 4.4 | 0 |
| 2013/8/11 | 24.2 | 84 | 18.47409386 | 2.4 | 0 |
| 2013/8/12 | 24.1 | 85 | 18.58853742 | 2   | 0 |
| 2013/8/13 | 23.4 | 81 | 17.02369411 | 3   | 0 |
| 2013/8/14 | 24.6 | 81 | 18.22131632 | 5.1 | 0 |
| 2013/8/15 | 25.7 | 81 | 19.3820914  | 5.8 | 0 |
| 2013/8/16 | 26.7 | 75 | 18.97400812 | 4.4 | 0 |
| 2013/8/17 | 25.1 | 87 | 20.12955173 | 5   | 0 |
| 2013/8/18 | 26   | 83 | 20.1961369  | 3.6 | 0 |
| 2013/8/19 | 25.9 | 79 | 19.11588214 | 1.9 | 0 |
| 2013/8/20 | 23.5 | 79 | 16.69810156 | 2.2 | 0 |
| 2013/8/21 | 22.1 | 81 | 15.80333746 | 2.1 | 0 |
| 2013/8/22 | 23.1 | 78 | 16.1152842  | 2.1 | 0 |
| 2013/8/23 | 23.7 | 74 | 15.82006611 | 3.2 | 1 |
| 2013/8/24 | 21.6 | 85 | 16.11270569 | 2.5 | 0 |
| 2013/8/25 | 21.3 | 84 | 15.64934958 | 2.9 | 0 |
| 2013/8/26 | 21   | 74 | 13.54871506 | 5   | 0 |
| 2013/8/27 | 20   | 81 | 13.99108305 | 3   | 0 |
| 2013/8/28 | 19.9 | 64 | 10.99018763 | 4.8 | 0 |
| 2013/8/29 | 20.1 | 65 | 11.29324672 | 2.3 | 0 |
| 2013/8/30 | 19.3 | 91 | 15.08608227 | 3.7 | 0 |
| 2013/8/31 | 19.1 | 89 | 14.58182828 | 3.7 | 1 |
| 2013/9/1  | 19.8 | 83 | 14.16967864 | 2.9 | 0 |

|            |      |    |             |     |   |
|------------|------|----|-------------|-----|---|
| 2013/9/2   | 20.2 | 85 | 14.85461815 | 4.8 | 0 |
| 2013/9/3   | 20.6 | 90 | 16.09952955 | 2.2 | 0 |
| 2013/9/4   | 21.3 | 95 | 17.69866917 | 2.3 | 0 |
| 2013/9/5   | 22.4 | 62 | 12.30665823 | 3.9 | 0 |
| 2013/9/6   | 18.2 | 79 | 12.27263418 | 2.8 | 0 |
| 2013/9/7   | 19   | 83 | 13.51887093 | 2   | 0 |
| 2013/9/8   | 20   | 78 | 13.47289479 | 2.2 | 0 |
| 2013/9/9   | 19.9 | 74 | 12.70740444 | 2.6 | 0 |
| 2013/9/10  | 20.5 | 71 | 12.62699593 | 1.7 | 0 |
| 2013/9/11  | 21.2 | 76 | 14.07718239 | 3.6 | 0 |
| 2013/9/12  | 21.5 | 77 | 14.51213904 | 1.7 | 0 |
| 2013/9/13  | 21.2 | 60 | 11.11356504 | 3.9 | 0 |
| 2013/9/14  | 23.4 | 84 | 17.6542013  | 3.5 | 0 |
| 2013/9/15  | 21.9 | 87 | 16.77966685 | 3.4 | 0 |
| 2013/9/16  | 17.9 | 88 | 13.42926386 | 2.9 | 0 |
| 2013/9/17  | 19.2 | 49 | 8.075615545 | 4.1 | 0 |
| 2013/9/18  | 17.6 | 53 | 7.94484499  | 3.5 | 0 |
| 2013/9/19  | 17.3 | 50 | 7.362082946 | 2.1 | 0 |
| 2013/9/20  | 19.5 | 64 | 10.73544215 | 4.4 | 0 |
| 2013/9/21  | 19.6 | 65 | 10.96737472 | 3.6 | 1 |
| 2013/9/22  | 16.7 | 58 | 8.238422674 | 4.2 | 0 |
| 2013/9/23  | 16.1 | 73 | 10.00110471 | 4.3 | 0 |
| 2013/9/24  | 18.4 | 76 | 11.94743417 | 3.7 | 0 |
| 2013/9/25  | 14.6 | 88 | 11.00633666 | 3.2 | 0 |
| 2013/9/26  | 12.8 | 61 | 6.829129374 | 2.9 | 0 |
| 2013/9/27  | 12.8 | 59 | 6.605223493 | 1.6 | 0 |
| 2013/9/28  | 15.5 | 63 | 8.323343457 | 4   | 0 |
| 2013/9/29  | 18.5 | 71 | 11.22771713 | 5.1 | 0 |
| 2013/9/30  | 17   | 91 | 13.16055757 | 3.3 | 0 |
| 2013/10/1  | 16.9 | 93 | 13.36941347 | 2.4 | 0 |
| 2013/10/2  | 19.6 | 79 | 13.3295785  | 3.5 | 0 |
| 2013/10/3  | 16.3 | 51 | 7.071867687 | 3.4 | 1 |
| 2013/10/4  | 13.5 | 55 | 6.429808257 | 2.4 | 0 |
| 2013/10/5  | 16.3 | 68 | 9.429156916 | 3.9 | 0 |
| 2013/10/6  | 16   | 80 | 10.89412817 | 2   | 0 |
| 2013/10/7  | 17.4 | 79 | 11.70180475 | 5.5 | 0 |
| 2013/10/8  | 17.1 | 65 | 9.456874626 | 3.6 | 0 |
| 2013/10/9  | 12.8 | 78 | 8.732329363 | 1.7 | 0 |
| 2013/10/10 | 14.8 | 72 | 9.11582598  | 1.9 | 0 |
| 2013/10/11 | 17   | 90 | 13.01593606 | 5.1 | 0 |
| 2013/10/12 | 16.2 | 59 | 8.132004503 | 5   | 0 |
| 2013/10/13 | 12.1 | 61 | 6.538176232 | 4.7 | 0 |
| 2013/10/14 | 14   | 60 | 7.233506441 | 3.6 | 0 |
| 2013/10/15 | 12.3 | 66 | 7.162825632 | 4.7 | 1 |
| 2013/10/16 | 6.9  | 72 | 5.539780102 | 4.7 | 0 |
| 2013/10/17 | 8.2  | 65 | 5.44069959  | 2.4 | 0 |
| 2013/10/18 | 9.7  | 61 | 5.620658634 | 2.4 | 0 |
| 2013/10/19 | 9.6  | 70 | 6.409004994 | 1.7 | 0 |
| 2013/10/20 | 11.4 | 77 | 7.899488587 | 3   | 0 |
| 2013/10/21 | 12.6 | 74 | 8.182309179 | 1.8 | 0 |

|            |      |    |             |     |   |
|------------|------|----|-------------|-----|---|
| 2013/10/22 | 11.7 | 64 | 6.690406927 | 1.8 | 0 |
| 2013/10/23 | 11.4 | 76 | 7.796897826 | 2.6 | 0 |
| 2013/10/24 | 11.6 | 76 | 7.895269724 | 3.9 | 1 |
| 2013/10/25 | 13   | 90 | 10.20141616 | 6.3 | 0 |
| 2013/10/26 | 11   | 69 | 6.903032828 | 4.6 | 0 |
| 2013/10/27 | 8.6  | 74 | 6.355484859 | 6.4 | 0 |
| 2013/10/28 | 8.5  | 79 | 6.741455644 | 2.2 | 0 |
| 2013/10/29 | 11.1 | 72 | 7.248632723 | 2.7 | 0 |
| 2013/10/30 | 12   | 78 | 8.308281481 | 2.3 | 0 |
| 2013/10/31 | 11.2 | 61 | 6.179935127 | 2.5 | 0 |
| 2013/11/1  | 10.1 | 48 | 4.536644834 | 4.4 | 0 |
| 2013/11/2  | 9.9  | 60 | 5.599268757 | 1.9 | 0 |
| 2013/11/3  | 11.4 | 73 | 7.489125543 | 2.2 | 0 |
| 2013/11/4  | 9.1  | 71 | 6.2963981   | 2.4 | 0 |
| 2013/11/5  | 9.9  | 68 | 6.345837925 | 1.5 | 0 |
| 2013/11/6  | 12.1 | 65 | 6.9669091   | 4.1 | 0 |
| 2013/11/7  | 12.6 | 76 | 8.403452671 | 3.4 | 0 |
| 2013/11/8  | 5    | 82 | 5.569045303 | 6.2 | 0 |
| 2013/11/9  | 6.5  | 57 | 4.272658274 | 4.1 | 0 |
| 2013/11/10 | 6.7  | 64 | 4.860449446 | 6.4 | 0 |
| 2013/11/11 | 0.3  | 65 | 3.213544148 | 2.6 | 0 |
| 2013/11/12 | 0.8  | 62 | 3.172480968 | 2.3 | 0 |
| 2013/11/13 | 1.6  | 69 | 3.729243627 | 2.4 | 0 |
| 2013/11/14 | 5    | 59 | 4.006996011 | 2.5 | 0 |
| 2013/11/15 | 8.3  | 75 | 6.318297444 | 4   | 0 |
| 2013/11/16 | 6.5  | 69 | 5.172165279 | 1.3 | 0 |
| 2013/11/17 | 5.4  | 71 | 4.951160591 | 2.8 | 0 |
| 2013/11/18 | 8.6  | 80 | 6.870794442 | 3.6 | 0 |
| 2013/11/19 | 7.3  | 83 | 6.554455588 | 1.6 | 0 |
| 2013/11/20 | 5.7  | 62 | 4.409873293 | 2.5 | 0 |
| 2013/11/21 | 7    | 66 | 5.111309356 | 2.9 | 0 |
| 2013/11/22 | 6.1  | 70 | 5.111474577 | 2.8 | 0 |
| 2013/11/23 | 6.5  | 70 | 5.247124196 | 1.9 | 0 |
| 2013/11/24 | 5.4  | 65 | 4.532752654 | 2.1 | 0 |
| 2013/11/25 | 7.7  | 75 | 6.078273888 | 7.6 | 0 |
| 2013/11/26 | 7.9  | 52 | 4.26912014  | 4.2 | 0 |
| 2013/11/27 | 2.5  | 65 | 3.734432922 | 2.6 | 0 |
| 2013/11/28 | 0.4  | 79 | 3.932696826 | 2.7 | 0 |
| 2013/11/29 | 0.5  | 64 | 3.207991585 | 2.4 | 0 |
| 2013/11/30 | 2.2  | 69 | 3.884513927 | 2.5 | 0 |
| 2013/12/1  | 1.6  | 62 | 3.350914563 | 2.7 | 0 |
| 2013/12/2  | 2.3  | 80 | 4.53441585  | 2.4 | 0 |
| 2013/12/3  | 1.9  | 76 | 4.19232233  | 1.6 | 0 |
| 2013/12/4  | 4.3  | 67 | 4.343644938 | 2.6 | 0 |
| 2013/12/5  | 6.5  | 63 | 4.722411777 | 2.5 | 0 |
| 2013/12/6  | 2.9  | 75 | 4.42692535  | 2.1 | 0 |
| 2013/12/7  | 1.1  | 61 | 3.186163427 | 3.4 | 0 |
| 2013/12/8  | 1.5  | 64 | 3.435500911 | 2.9 | 0 |
| 2013/12/9  | 3.1  | 59 | 3.529739703 | 2.9 | 0 |
| 2013/12/10 | 7.1  | 90 | 7.015466524 | 3.4 | 0 |

|            |      |    |             |     |   |
|------------|------|----|-------------|-----|---|
| 2013/12/11 | 3.5  | 64 | 3.933146038 | 5.4 | 0 |
| 2013/12/12 | -0.1 | 66 | 3.174088347 | 2.5 | 0 |
| 2013/12/13 | -2.7 | 81 | 3.247581377 | 3.2 | 0 |
| 2013/12/14 | -3.3 | 52 | 1.997978613 | 4.3 | 0 |
| 2013/12/15 | -0.6 | 78 | 3.62339895  | 7.7 | 0 |
| 2013/12/16 | 2.9  | 75 | 4.42692535  | 5.2 | 0 |
| 2013/12/17 | 2    | 66 | 3.665526706 | 3.1 | 0 |
| 2013/12/18 | 1.2  | 70 | 3.681358136 | 1.8 | 0 |
| 2013/12/19 | -0.2 | 67 | 3.199958929 | 1.9 | 0 |
| 2013/12/20 | 0.2  | 61 | 2.995061131 | 1.9 | 0 |
| 2013/12/21 | -0.1 | 55 | 2.645073623 | 3.6 | 0 |
| 2013/12/22 | -2.9 | 77 | 3.043785648 | 2.5 | 0 |
| 2013/12/23 | -1.6 | 83 | 3.595797726 | 2.9 | 0 |
| 2013/12/24 | -2.7 | 69 | 2.76645821  | 1.7 | 0 |
| 2013/12/25 | -0.9 | 74 | 3.366585717 | 2   | 0 |
| 2013/12/26 | 2.3  | 67 | 3.797573274 | 2.7 | 0 |
| 2013/12/27 | 2.1  | 76 | 4.249666829 | 4.3 | 0 |
| 2013/12/28 | -1.8 | 76 | 3.246669419 | 5.7 | 0 |
| 2013/12/29 | -3   | 72 | 2.826024609 | 3.4 | 0 |
| 2013/12/30 | -2   | 88 | 3.706839667 | 1.5 | 0 |
| 2013/12/31 | -0.6 | 71 | 3.298222121 | 2.3 | 0 |
| 2014/1/1   | -0.3 | 82 | 3.889335145 | 3.6 | 0 |
| 2014/1/2   | -3.4 | 66 | 2.517912755 | 5.2 | 0 |
| 2014/1/3   | -1.7 | 70 | 3.0114121   | 3.4 | 0 |
| 2014/1/4   | -3.7 | 73 | 2.726032371 | 3.2 | 0 |
| 2014/1/5   | -4.2 | 73 | 2.630239654 | 2.7 | 0 |
| 2014/1/6   | -3.7 | 67 | 2.501974916 | 3.3 | 0 |
| 2014/1/7   | 0.1  | 61 | 2.974459322 | 2.9 | 0 |
| 2014/1/8   | 0.4  | 73 | 3.634010991 | 3.3 | 0 |
| 2014/1/9   | -5.1 | 56 | 1.891135634 | 4.1 | 0 |
| 2014/1/10  | -7   | 47 | 1.381933059 | 4.5 | 0 |
| 2014/1/11  | -6.6 | 59 | 1.786438625 | 3.3 | 0 |
| 2014/1/12  | -6.2 | 74 | 2.30711553  | 3.5 | 0 |
| 2014/1/13  | -7.6 | 65 | 1.828506191 | 3.8 | 0 |
| 2014/1/14  | -4.6 | 55 | 1.925560267 | 2.8 | 0 |
| 2014/1/15  | -4.7 | 64 | 2.224579798 | 1.9 | 0 |
| 2014/1/16  | -5.2 | 62 | 2.07867241  | 2.2 | 0 |
| 2014/1/17  | -6.5 | 78 | 2.379086991 | 1.8 | 0 |
| 2014/1/18  | -6   | 68 | 2.151197823 | 1.7 | 0 |
| 2014/1/19  | -5.7 | 75 | 2.425003187 | 1.9 | 0 |
| 2014/1/20  | -7   | 74 | 2.175809497 | 1.3 | 0 |
| 2014/1/21  | -6.3 | 80 | 2.476033236 | 2   | 0 |
| 2014/1/22  | -5.4 | 75 | 2.478373093 | 3   | 0 |
| 2014/1/23  | -8.1 | 75 | 2.033107037 | 2.2 | 0 |
| 2014/1/24  | -1.8 | 82 | 3.502985426 | 4.2 | 0 |
| 2014/1/25  | 1.7  | 70 | 3.80915569  | 3   | 0 |
| 2014/1/26  | -2.6 | 85 | 3.432145913 | 4.6 | 0 |
| 2014/1/27  | -4.9 | 62 | 2.1242155   | 4.2 | 0 |
| 2014/1/28  | -2.1 | 77 | 3.220743749 | 3.7 | 0 |
| 2014/1/29  | -6.1 | 54 | 1.695897888 | 5.5 | 0 |



|           |      |    |             |     |   |
|-----------|------|----|-------------|-----|---|
| 2014/1/30 | 1.6  | 73 | 3.945431663 | 4.8 | 0 |
| 2014/1/31 | -3.1 | 71 | 2.767063892 | 5.8 | 0 |
| 2014/2/1  | -5.1 | 59 | 1.992446472 | 4.1 | 0 |
| 2014/2/2  | -2.2 | 71 | 2.94893661  | 4.6 | 0 |
| 2014/2/3  | -1.5 | 59 | 2.574017666 | 3.1 | 0 |
| 2014/2/4  | -6.4 | 70 | 2.150753095 | 2.6 | 0 |
| 2014/2/5  | -8.5 | 69 | 1.815635705 | 2.4 | 0 |
| 2014/2/6  | -7.7 | 53 | 1.479952901 | 3.3 | 0 |
| 2014/2/7  | -7.6 | 63 | 1.772244462 | 3.9 | 1 |
| 2014/2/8  | -9.2 | 61 | 1.523310408 | 1.7 | 0 |
| 2014/2/9  | -6.6 | 68 | 2.058946212 | 1.6 | 0 |
| 2014/2/10 | -3.2 | 79 | 3.057050505 | 1.9 | 0 |
| 2014/2/11 | -4   | 80 | 2.92405104  | 1.7 | 0 |
| 2014/2/12 | -4.4 | 69 | 2.450688142 | 2.1 | 0 |
| 2014/2/13 | -3.7 | 73 | 2.726032371 | 3.1 | 0 |
| 2014/2/14 | -4.7 | 56 | 1.946507323 | 2   | 0 |
| 2014/2/15 | -4.1 | 68 | 2.467709299 | 2.1 | 0 |
| 2014/2/16 | -1   | 85 | 3.840169707 | 5.7 | 0 |
| 2014/2/17 | -1.9 | 77 | 3.266366132 | 9.3 | 0 |
| 2014/2/18 | -2.9 | 77 | 3.043785648 | 8.6 | 0 |
| 2014/2/19 | -1.9 | 79 | 3.351206811 | 6.8 | 0 |
| 2014/2/20 | -3   | 64 | 2.512021875 | 2.6 | 0 |
| 2014/2/21 | -3.7 | 82 | 3.062118554 | 3.2 | 0 |
| 2014/2/22 | -2.8 | 76 | 3.025618202 | 2.2 | 0 |
| 2014/2/23 | -2.8 | 76 | 3.025618202 | 1.8 | 0 |
| 2014/2/24 | -2.6 | 66 | 2.664960356 | 1.4 | 0 |
| 2014/2/25 | -0.6 | 67 | 3.112406791 | 2   | 0 |
| 2014/2/26 | 1.2  | 64 | 3.365813153 | 2.3 | 0 |
| 2014/2/27 | 2.1  | 61 | 3.410916797 | 3.9 | 0 |
| 2014/2/28 | 0.7  | 58 | 2.947495947 | 6   | 1 |
| 2014/3/1  | -0.8 | 42 | 1.924115228 | 3.3 | 0 |
| 2014/3/2  | -2.6 | 47 | 1.897774799 | 3.9 | 0 |
| 2014/3/3  | -4   | 63 | 2.302690194 | 2.6 | 0 |
| 2014/3/4  | -3   | 63 | 2.472771533 | 3.7 | 0 |
| 2014/3/5  | -1.7 | 88 | 3.785775211 | 3.2 | 0 |
| 2014/3/6  | -4.2 | 73 | 2.630239654 | 7.4 | 0 |
| 2014/3/7  | -5.7 | 65 | 2.101669428 | 2.4 | 0 |
| 2014/3/8  | -4.5 | 65 | 2.29208875  | 2   | 0 |
| 2014/3/9  | -2.3 | 71 | 2.92822469  | 2   | 0 |
| 2014/3/10 | -1.9 | 71 | 3.011844096 | 5   | 0 |
| 2014/3/11 | -2.7 | 75 | 3.007019793 | 2   | 0 |
| 2014/3/12 | -2.1 | 73 | 3.053432385 | 1.8 | 0 |
| 2014/3/13 | -0.4 | 70 | 3.297227052 | 2.1 | 0 |
| 2014/3/14 | -0.1 | 65 | 3.125996099 | 6   | 0 |
| 2014/3/15 | -1   | 71 | 3.207671167 | 2.7 | 0 |
| 2014/3/16 | 0.6  | 80 | 4.037667151 | 3.1 | 0 |
| 2014/3/17 | 1.7  | 63 | 3.428240121 | 3.3 | 0 |
| 2014/3/18 | 2.1  | 77 | 4.305583498 | 6.2 | 0 |
| 2014/3/19 | 1.5  | 63 | 3.38182121  | 4.3 | 0 |
| 2014/3/20 | 0.9  | 62 | 3.19432102  | 3.1 | 0 |

|           |      |    |             |     |   |
|-----------|------|----|-------------|-----|---|
| 2014/3/21 | -0.8 | 76 | 3.481732316 | 5.3 | 0 |
| 2014/3/22 | 0    | 79 | 3.825648205 | 3.7 | 0 |
| 2014/3/23 | 0.9  | 62 | 3.19432102  | 2.7 | 0 |
| 2014/3/24 | 4.8  | 57 | 3.820200937 | 1.9 | 0 |
| 2014/3/25 | 7.6  | 63 | 5.072802914 | 3   | 0 |
| 2014/3/26 | 5.8  | 74 | 5.298137279 | 2.1 | 0 |
| 2014/3/27 | 5.2  | 69 | 4.748558056 | 1.6 | 0 |
| 2014/3/28 | 5.3  | 73 | 5.05713726  | 2.9 | 0 |
| 2014/3/29 | 6.8  | 64 | 4.892258685 | 3.2 | 0 |
| 2014/3/30 | 4.2  | 71 | 4.572398839 | 3.4 | 0 |
| 2014/3/31 | 4.4  | 66 | 4.307395407 | 6.2 | 0 |
| 2014/4/1  | 4.7  | 57 | 3.794938623 | 5.9 | 0 |
| 2014/4/2  | 6.4  | 54 | 4.021396426 | 2.8 | 0 |
| 2014/4/3  | 7.2  | 67 | 5.256688987 | 4.5 | 0 |
| 2014/4/4  | 2.4  | 87 | 4.964686723 | 5.9 | 0 |
| 2014/4/5  | 1.6  | 66 | 3.567102599 | 5.8 | 0 |
| 2014/4/6  | 2.7  | 58 | 3.377607264 | 3.3 | 0 |
| 2014/4/7  | 4.5  | 58 | 3.810549646 | 4.3 | 0 |
| 2014/4/8  | 3.9  | 51 | 3.219287943 | 2.9 | 0 |
| 2014/4/9  | 8.5  | 41 | 3.498730144 | 3.2 | 0 |
| 2014/4/10 | 3.9  | 72 | 4.544877096 | 5.8 | 0 |
| 2014/4/11 | 2.9  | 50 | 2.951283567 | 6.3 | 0 |
| 2014/4/12 | 4.5  | 49 | 3.21925746  | 6.1 | 0 |
| 2014/4/13 | 4.1  | 60 | 3.838316465 | 4.6 | 1 |
| 2014/4/14 | 7.7  | 39 | 3.160702422 | 1.9 | 0 |
| 2014/4/15 | 9.1  | 42 | 3.724629862 | 3.7 | 0 |
| 2014/4/16 | 6    | 33 | 2.393934678 | 5.3 | 0 |
| 2014/4/17 | 5    | 43 | 2.920353025 | 4   | 0 |
| 2014/4/18 | 4.5  | 56 | 3.679151382 | 5.1 | 0 |
| 2014/4/19 | 3.6  | 52 | 3.217174072 | 3.5 | 0 |
| 2014/4/20 | 6    | 56 | 4.062434604 | 2.1 | 0 |
| 2014/4/21 | 8.6  | 48 | 4.122476665 | 3   | 1 |
| 2014/4/22 | 8.5  | 65 | 5.546767302 | 2.9 | 0 |
| 2014/4/23 | 8.1  | 73 | 6.071059454 | 3.9 | 0 |
| 2014/4/24 | 12.5 | 53 | 5.823995438 | 1.9 | 0 |
| 2014/4/25 | 14.5 | 42 | 5.221009049 | 1.8 | 0 |
| 2014/4/26 | 16.4 | 36 | 5.022068963 | 1.9 | 0 |
| 2014/4/27 | 17.9 | 31 | 4.730763405 | 3.6 | 0 |
| 2014/4/28 | 10.3 | 57 | 5.455979031 | 5.1 | 0 |
| 2014/4/29 | 9.6  | 40 | 3.662288568 | 3   | 0 |
| 2014/4/30 | 12.8 | 52 | 5.821552909 | 4   | 0 |
| 2014/5/1  | 14.2 | 76 | 9.27557369  | 3.1 | 0 |
| 2014/5/2  | 12.9 | 79 | 8.899281231 | 2.8 | 0 |
| 2014/5/3  | 13.2 | 68 | 7.803697942 | 5.3 | 0 |
| 2014/5/4  | 11.7 | 42 | 4.390579546 | 3.2 | 0 |
| 2014/5/5  | 12.4 | 55 | 6.00629427  | 5.6 | 0 |
| 2014/5/6  | 11.9 | 48 | 5.08095565  | 3.7 | 0 |
| 2014/5/7  | 12.5 | 50 | 5.494335319 | 4.1 | 0 |
| 2014/5/8  | 14.5 | 45 | 5.593938267 | 3.6 | 0 |
| 2014/5/9  | 12.6 | 77 | 8.514024416 | 4   | 0 |

|           |      |    |             |     |   |
|-----------|------|----|-------------|-----|---|
| 2014/5/10 | 11.8 | 73 | 7.679135802 | 4.7 | 0 |
| 2014/5/11 | 15.5 | 50 | 6.605828141 | 2.1 | 0 |
| 2014/5/12 | 18.2 | 39 | 6.058642188 | 4.7 | 0 |
| 2014/5/13 | 15   | 65 | 8.33051054  | 4.4 | 0 |
| 2014/5/14 | 16.7 | 64 | 9.090673296 | 3.2 | 0 |
| 2014/5/15 | 14.6 | 74 | 9.255328551 | 2.2 | 0 |
| 2014/5/16 | 10.3 | 91 | 8.710422663 | 4   | 0 |
| 2014/5/17 | 7    | 81 | 6.272970573 | 9.5 | 0 |
| 2014/5/18 | 8.5  | 79 | 6.741455644 | 6   | 0 |
| 2014/5/19 | 12.3 | 67 | 7.271353293 | 3   | 0 |
| 2014/5/20 | 14.9 | 61 | 7.770372055 | 2.2 | 0 |
| 2014/5/21 | 15.7 | 77 | 10.2970428  | 3.8 | 0 |
| 2014/5/22 | 14.1 | 65 | 7.88454898  | 2.7 | 0 |
| 2014/5/23 | 11.3 | 63 | 6.422777051 | 3   | 0 |
| 2014/5/24 | 12.7 | 68 | 7.565712969 | 3   | 0 |
| 2014/5/25 | 11.4 | 83 | 8.515033152 | 3.6 | 0 |
| 2014/5/26 | 12.1 | 73 | 7.824374835 | 9.5 | 0 |
| 2014/5/27 | 16.2 | 71 | 9.785971521 | 6   | 0 |
| 2014/5/28 | 18.9 | 63 | 10.20096299 | 4.5 | 0 |
| 2014/5/29 | 20.8 | 54 | 9.77273973  | 5.2 | 0 |
| 2014/5/30 | 18.9 | 65 | 10.52480309 | 3.8 | 0 |
| 2014/5/31 | 20   | 60 | 10.36376522 | 2.1 | 0 |
| 2014/6/1  | 17.9 | 54 | 8.240684641 | 3.8 | 0 |
| 2014/6/2  | 21.5 | 44 | 8.292650879 | 2.2 | 0 |
| 2014/6/3  | 23.9 | 45 | 9.730112116 | 1.9 | 0 |
| 2014/6/4  | 23.9 | 47 | 10.16256154 | 2.5 | 0 |
| 2014/6/5  | 21.8 | 47 | 9.012786685 | 7.8 | 0 |
| 2014/6/6  | 18.8 | 62 | 9.979954004 | 7.4 | 0 |
| 2014/6/7  | 18   | 67 | 10.28553324 | 6.8 | 0 |
| 2014/6/8  | 18.1 | 82 | 12.66328113 | 4.6 | 0 |
| 2014/6/9  | 19.7 | 80 | 13.57771308 | 5.6 | 0 |
| 2014/6/10 | 19.6 | 76 | 12.82339198 | 4.7 | 0 |
| 2014/6/11 | 18.7 | 78 | 12.48146641 | 5.9 | 0 |
| 2014/6/12 | 17.9 | 83 | 12.6662375  | 5.3 | 0 |
| 2014/6/13 | 15.7 | 92 | 12.30296022 | 2.7 | 0 |
| 2014/6/14 | 15   | 79 | 10.12477435 | 2.3 | 0 |
| 2014/6/15 | 16.2 | 88 | 12.12909146 | 1.6 | 0 |
| 2014/6/16 | 15.7 | 92 | 12.30296022 | 1.5 | 0 |
| 2014/6/17 | 17   | 85 | 12.2928285  | 1.8 | 0 |
| 2014/6/18 | 16.9 | 87 | 12.50687067 | 1.8 | 0 |
| 2014/6/19 | 15.6 | 86 | 11.43112714 | 3.4 | 0 |
| 2014/6/20 | 14.9 | 82 | 10.44541817 | 4.8 | 0 |
| 2014/6/21 | 15.3 | 80 | 10.44177    | 3.7 | 0 |
| 2014/6/22 | 16.6 | 79 | 11.15406891 | 3.2 | 0 |
| 2014/6/23 | 16.6 | 76 | 10.73049667 | 4.6 | 0 |
| 2014/6/24 | 17.3 | 73 | 10.7486411  | 2.8 | 0 |
| 2014/6/25 | 20   | 70 | 12.09105943 | 2.2 | 0 |
| 2014/6/26 | 21.3 | 67 | 12.48221931 | 3   | 0 |
| 2014/6/27 | 22.6 | 68 | 13.65328693 | 6.3 | 0 |
| 2014/6/28 | 21.9 | 73 | 14.07949057 | 6.4 | 0 |

|           |      |    |             |     |   |
|-----------|------|----|-------------|-----|---|
| 2014/6/29 | 21.8 | 69 | 13.2315379  | 5.9 | 0 |
| 2014/6/30 | 21.2 | 65 | 12.03969546 | 2.4 | 0 |
| 2014/7/1  | 21.2 | 70 | 12.96582588 | 2.7 | 0 |
| 2014/7/2  | 21.4 | 75 | 14.05371435 | 2.1 | 0 |
| 2014/7/3  | 21.6 | 75 | 14.21709326 | 2.5 | 0 |
| 2014/7/4  | 22.3 | 66 | 13.02565246 | 3.6 | 0 |
| 2014/7/5  | 20.2 | 65 | 11.35941388 | 2.2 | 0 |
| 2014/7/6  | 19.8 | 72 | 12.29176942 | 1.6 | 0 |
| 2014/7/7  | 21.8 | 72 | 13.80682216 | 1.8 | 0 |
| 2014/7/8  | 21.9 | 74 | 14.27236031 | 2.6 | 0 |
| 2014/7/9  | 21.3 | 73 | 13.60002999 | 5.2 | 0 |
| 2014/7/10 | 20.3 | 83 | 14.59001478 | 4.9 | 0 |
| 2014/7/11 | 21   | 80 | 14.64725952 | 4.3 | 0 |
| 2014/7/12 | 19.7 | 77 | 13.06854884 | 3.2 | 0 |
| 2014/7/13 | 22.5 | 75 | 14.97271752 | 2.2 | 0 |
| 2014/7/14 | 24   | 69 | 15.00430474 | 3.3 | 0 |
| 2014/7/15 | 25.5 | 57 | 13.48749222 | 2.6 | 0 |
| 2014/7/16 | 24.3 | 63 | 13.93413561 | 2   | 0 |
| 2014/7/17 | 24.2 | 71 | 15.6150079  | 2.4 | 0 |
| 2014/7/18 | 23.9 | 65 | 14.05460639 | 4.8 | 0 |
| 2014/7/19 | 21.9 | 67 | 12.92227217 | 6.6 | 0 |
| 2014/7/20 | 21.9 | 65 | 12.5365327  | 6.2 | 0 |
| 2014/7/21 | 22.9 | 58 | 11.84707807 | 6.6 | 0 |
| 2014/7/22 | 22.6 | 73 | 14.65720508 | 5.6 | 0 |
| 2014/7/23 | 22.9 | 85 | 17.36209717 | 2   | 0 |
| 2014/7/24 | 25.7 | 62 | 14.8356749  | 2.8 | 0 |
| 2014/7/25 | 25   | 50 | 11.50388899 | 2.6 | 1 |
| 2014/7/26 | 21.4 | 76 | 14.24109721 | 3.1 | 0 |
| 2014/7/27 | 21.5 | 86 | 16.20836308 | 5.4 | 0 |
| 2014/7/28 | 20.6 | 76 | 13.59515829 | 5   | 1 |
| 2014/7/29 | 23.9 | 61 | 13.18970754 | 2   | 0 |
| 2014/7/30 | 24.9 | 59 | 13.49847147 | 2.1 | 0 |
| 2014/7/31 | 26.1 | 63 | 15.41529436 | 2.4 | 0 |
| 2014/8/1  | 25.4 | 70 | 16.47107295 | 2.6 | 1 |
| 2014/8/2  | 25.1 | 69 | 15.96481689 | 2.3 | 0 |
| 2014/8/3  | 25.8 | 72 | 17.32506549 | 2.7 | 0 |
| 2014/8/4  | 27   | 74 | 19.03475617 | 3.5 | 0 |
| 2014/8/5  | 24.9 | 90 | 20.59088869 | 2.5 | 1 |
| 2014/8/6  | 23.3 | 88 | 18.38985404 | 1.9 | 0 |
| 2014/8/7  | 22.4 | 87 | 17.26902043 | 1.9 | 0 |
| 2014/8/8  | 22.6 | 82 | 16.46425777 | 1.9 | 0 |
| 2014/8/9  | 23.3 | 73 | 15.25521983 | 1.9 | 0 |
| 2014/8/10 | 21.7 | 74 | 14.10873612 | 4.4 | 0 |
| 2014/8/11 | 23.5 | 79 | 16.69810156 | 6.8 | 0 |
| 2014/8/12 | 23.9 | 59 | 12.75725811 | 4.8 | 0 |
| 2014/8/13 | 23.3 | 62 | 12.95648808 | 2.9 | 0 |
| 2014/8/14 | 21.7 | 67 | 12.77412594 | 2.6 | 0 |
| 2014/8/15 | 20.9 | 74 | 13.47029819 | 1.7 | 0 |
| 2014/8/16 | 22   | 71 | 13.77283304 | 2.1 | 0 |
| 2014/8/17 | 22.3 | 67 | 13.22301083 | 3.4 | 0 |

|           |      |    |             |     |   |
|-----------|------|----|-------------|-----|---|
| 2014/8/18 | 22.1 | 76 | 14.8278228  | 3.6 | 0 |
| 2014/8/19 | 20.6 | 88 | 15.74176223 | 4.3 | 0 |
| 2014/8/20 | 22   | 85 | 16.48860293 | 4   | 0 |
| 2014/8/21 | 22.7 | 73 | 14.74137939 | 2.3 | 0 |
| 2014/8/22 | 21.1 | 83 | 15.2849269  | 5   | 0 |
| 2014/8/23 | 23.8 | 78 | 16.77013391 | 4.6 | 0 |
| 2014/8/24 | 24   | 66 | 14.35194367 | 2.8 | 0 |
| 2014/8/25 | 19.3 | 74 | 12.26780316 | 3   | 0 |
| 2014/8/26 | 17.9 | 57 | 8.698500454 | 3.1 | 0 |
| 2014/8/27 | 18.6 | 66 | 10.4989782  | 2.1 | 0 |
| 2014/8/28 | 20   | 69 | 11.91833001 | 1.8 | 0 |
| 2014/8/29 | 20.6 | 61 | 10.91190336 | 2.7 | 0 |
| 2014/8/30 | 21.1 | 57 | 10.49687751 | 3.7 | 0 |
| 2014/8/31 | 20.9 | 63 | 11.46795657 | 2.1 | 0 |
| 2014/9/1  | 21.1 | 61 | 11.2335005  | 3   | 0 |
| 2014/9/2  | 21.8 | 64 | 12.27273081 | 3.2 | 1 |
| 2014/9/3  | 21.6 | 67 | 12.70060331 | 3.7 | 0 |
| 2014/9/4  | 18.7 | 84 | 13.44157921 | 6.9 | 0 |
| 2014/9/5  | 22.3 | 80 | 15.78866965 | 2.9 | 0 |
| 2014/9/6  | 23   | 54 | 11.09323098 | 2.8 | 0 |
| 2014/9/7  | 20.2 | 71 | 12.40797516 | 2.5 | 0 |
| 2014/9/8  | 20.3 | 71 | 12.48061506 | 2.8 | 0 |
| 2014/9/9  | 21   | 70 | 12.81635208 | 3.5 | 0 |
| 2014/9/10 | 19.8 | 77 | 13.14536452 | 4.9 | 0 |
| 2014/9/11 | 18.6 | 80 | 12.72603418 | 4.4 | 0 |
| 2014/9/12 | 18.6 | 75 | 11.93065704 | 2.2 | 0 |
| 2014/9/13 | 18.4 | 65 | 10.21820028 | 3.3 | 0 |
| 2014/9/14 | 15.7 | 63 | 8.424853197 | 2.4 | 0 |
| 2014/9/15 | 17.3 | 65 | 9.570707829 | 1.4 | 0 |
| 2014/9/16 | 17.4 | 66 | 9.776191309 | 3.8 | 0 |
| 2014/9/17 | 15   | 60 | 7.689702037 | 2.8 | 0 |
| 2014/9/18 | 14.8 | 66 | 8.356173815 | 3.5 | 0 |
| 2014/9/19 | 15.4 | 74 | 9.71747647  | 4.4 | 0 |
| 2014/9/20 | 15.4 | 73 | 9.58615922  | 2.1 | 0 |
| 2014/9/21 | 16.4 | 59 | 8.230613023 | 1.8 | 0 |
| 2014/9/22 | 16.5 | 66 | 9.262712829 | 2   | 0 |
| 2014/9/23 | 17.6 | 63 | 9.443872347 | 1.5 | 0 |
| 2014/9/24 | 18.1 | 66 | 10.19239701 | 2.7 | 0 |
| 2014/9/25 | 18.3 | 72 | 11.25173286 | 4.6 | 0 |
| 2014/9/26 | 16   | 57 | 7.762066324 | 3.7 | 0 |
| 2014/9/27 | 15.5 | 64 | 8.45546002  | 5.6 | 0 |
| 2014/9/28 | 18.7 | 64 | 10.24120321 | 5.5 | 0 |
| 2014/9/29 | 15.2 | 59 | 7.654139076 | 1.8 | 0 |
| 2014/9/30 | 13   | 71 | 8.047783862 | 3.6 | 0 |
| 2014/10/1 | 12.2 | 63 | 6.794778191 | 2   | 0 |
| 2014/10/2 | 13.7 | 62 | 7.338013895 | 2.8 | 0 |
| 2014/10/3 | 13.4 | 87 | 10.10823959 | 2.8 | 0 |
| 2014/10/4 | 13   | 73 | 8.274481999 | 3.5 | 0 |
| 2014/10/5 | 13.2 | 54 | 6.197054248 | 2.8 | 0 |
| 2014/10/6 | 10.8 | 69 | 6.816597014 | 1.8 | 0 |

|            |      |    |             |     |   |
|------------|------|----|-------------|-----|---|
| 2014/10/7  | 11   | 60 | 6.002637242 | 2.4 | 0 |
| 2014/10/8  | 12.7 | 66 | 7.343192    | 2   | 1 |
| 2014/10/9  | 14.3 | 61 | 7.490633126 | 2.6 | 0 |
| 2014/10/10 | 12.6 | 61 | 6.744876486 | 6.6 | 0 |
| 2014/10/11 | 12.2 | 55 | 5.931949215 | 6.7 | 0 |
| 2014/10/12 | 12.1 | 66 | 7.074092317 | 2.7 | 0 |
| 2014/10/13 | 12.2 | 62 | 6.686924569 | 3   | 0 |
| 2014/10/14 | 8.5  | 78 | 6.656120763 | 2.5 | 0 |
| 2014/10/15 | 9.9  | 61 | 5.692589903 | 2.4 | 0 |
| 2014/10/16 | 10.9 | 73 | 7.257360319 | 4.5 | 0 |
| 2014/10/17 | 11.4 | 78 | 8.002079347 | 3.1 | 0 |
| 2014/10/18 | 10.9 | 51 | 5.070210634 | 4.2 | 0 |
| 2014/10/19 | 11.9 | 57 | 6.033634835 | 2.6 | 0 |
| 2014/10/20 | 15.6 | 62 | 8.241045145 | 3.7 | 0 |
| 2014/10/21 | 10.5 | 70 | 6.785642997 | 3.8 | 0 |
| 2014/10/22 | 6.2  | 53 | 3.895573753 | 2.6 | 0 |
| 2014/10/23 | 6.8  | 56 | 4.28072635  | 1.9 | 0 |
| 2014/10/24 | 10.1 | 59 | 5.576292608 | 2.1 | 0 |
| 2014/10/25 | 14.2 | 69 | 8.421244535 | 3.9 | 0 |
| 2014/10/26 | 17.7 | 63 | 9.500333725 | 5.5 | 0 |
| 2014/10/27 | 9.4  | 73 | 6.599011514 | 4   | 0 |
| 2014/10/28 | 4.9  | 68 | 4.58774491  | 3.7 | 0 |
| 2014/10/29 | 7.3  | 52 | 4.106405911 | 5.1 | 0 |
| 2014/10/30 | 8.6  | 55 | 4.723671179 | 1.5 | 0 |
| 2014/10/31 | 10.7 | 73 | 7.16641272  | 1.5 | 0 |
| 2014/11/1  | 11.3 | 72 | 7.34031663  | 3   | 0 |
| 2014/11/2  | 14.2 | 87 | 10.61809093 | 3.9 | 0 |
| 2014/11/3  | 6.5  | 65 | 4.872329611 | 5   | 0 |
| 2014/11/4  | 6.4  | 54 | 4.021396426 | 4.2 | 0 |
| 2014/11/5  | 10.9 | 55 | 5.467874213 | 3.4 | 0 |
| 2014/11/6  | 11.2 | 70 | 7.091728834 | 4   | 0 |
| 2014/11/7  | 4.2  | 49 | 3.155599199 | 5   | 0 |
| 2014/11/8  | 8.7  | 47 | 4.062588791 | 2.6 | 0 |
| 2014/11/9  | 10.2 | 62 | 5.897100461 | 1.8 | 0 |
| 2014/11/10 | 9.1  | 80 | 7.09453307  | 3.7 | 0 |
| 2014/11/11 | 7.8  | 67 | 5.465161517 | 2.6 | 0 |
| 2014/11/12 | 9.3  | 75 | 6.736674198 | 5.3 | 0 |
| 2014/11/13 | 4.6  | 61 | 4.034370967 | 4.3 | 1 |
| 2014/11/14 | -0.4 | 86 | 4.050878949 | 2.4 | 0 |
| 2014/11/15 | 0.1  | 72 | 3.510837233 | 3.2 | 0 |
| 2014/11/16 | 2.8  | 59 | 3.459109538 | 2.7 | 0 |
| 2014/11/17 | 2.3  | 60 | 3.400811887 | 1.6 | 0 |
| 2014/11/18 | 1.9  | 83 | 4.578457281 | 1.5 | 0 |
| 2014/11/19 | 3.8  | 57 | 3.574051805 | 2.9 | 0 |
| 2014/11/20 | 3.7  | 62 | 3.861637779 | 1.8 | 0 |
| 2014/11/21 | 6.4  | 65 | 4.840569772 | 3.6 | 0 |
| 2014/11/22 | 8.7  | 75 | 6.482854454 | 2.9 | 0 |
| 2014/11/23 | 3.8  | 53 | 3.323241152 | 4.4 | 0 |
| 2014/11/24 | 4.4  | 67 | 4.372658973 | 2.5 | 1 |
| 2014/11/25 | 3.7  | 52 | 3.238792976 | 4.7 | 0 |

|            |      |    |             |     |   |
|------------|------|----|-------------|-----|---|
| 2014/11/26 | 2.9  | 61 | 3.600565951 | 3.3 | 0 |
| 2014/11/27 | 5.5  | 72 | 5.054119541 | 2.5 | 0 |
| 2014/11/28 | 6.4  | 67 | 4.98951038  | 1.6 | 0 |
| 2014/11/29 | 6.4  | 71 | 5.287391597 | 2.3 | 0 |
| 2014/11/30 | 5.3  | 76 | 5.264964819 | 2.4 | 0 |
| 2014/12/1  | 8.8  | 75 | 6.524571194 | 6   | 0 |
| 2014/12/2  | 0.1  | 47 | 2.291796527 | 5.1 | 0 |
| 2014/12/3  | -1.3 | 52 | 2.300591928 | 3.8 | 0 |
| 2014/12/4  | -1.4 | 61 | 2.6799645   | 1.9 | 0 |
| 2014/12/5  | -2.4 | 56 | 2.293350075 | 1.9 | 0 |
| 2014/12/6  | -3.5 | 52 | 1.969729615 | 2.6 | 0 |
| 2014/12/7  | -1.9 | 63 | 2.672481381 | 3.9 | 0 |
| 2014/12/8  | -1.6 | 68 | 2.945954764 | 2.1 | 0 |
| 2014/12/9  | -2   | 73 | 3.074991997 | 2.5 | 0 |
| 2014/12/10 | -0.9 | 63 | 2.866147299 | 2.7 | 0 |
| 2014/12/11 | 1.6  | 79 | 4.269713718 | 4.5 | 0 |
| 2014/12/12 | -1.8 | 64 | 2.734037405 | 2.9 | 0 |
| 2014/12/13 | -4.8 | 74 | 2.553703991 | 1.9 | 0 |
| 2014/12/14 | -4.8 | 53 | 1.829004209 | 2.4 | 0 |
| 2014/12/15 | -3.7 | 88 | 3.286176009 | 1.3 | 0 |
| 2014/12/16 | -1.2 | 83 | 3.697845254 | 5.5 | 0 |
| 2014/12/17 | -0.6 | 60 | 2.787229962 | 3.7 | 0 |
| 2014/12/18 | 1    | 64 | 3.320043712 | 5.4 | 0 |
| 2014/12/19 | -0.2 | 75 | 3.582043577 | 1.9 | 0 |
| 2014/12/20 | 3.7  | 69 | 4.297629141 | 6.6 | 1 |
| 2014/12/21 | -2.5 | 53 | 2.155220885 | 3.3 | 0 |
| 2014/12/22 | -6.5 | 70 | 2.135078069 | 2.3 | 0 |
| 2014/12/23 | -3.3 | 58 | 2.228514607 | 3.1 | 0 |
| 2014/12/24 | -2.4 | 88 | 3.603835832 | 2.3 | 0 |
| 2014/12/25 | -5   | 74 | 2.517119747 | 2.3 | 0 |
| 2014/12/26 | -4.4 | 70 | 2.486205361 | 3.1 | 0 |
| 2014/12/27 | -2   | 66 | 2.78012975  | 2.7 | 0 |
| 2014/12/28 | 1.2  | 69 | 3.628767305 | 2.4 | 0 |
| 2014/12/29 | 1.7  | 76 | 4.135654749 | 2.4 | 0 |
| 2014/12/30 | 0.2  | 75 | 3.68245221  | 2   | 0 |
| 2014/12/31 | -1.2 | 70 | 3.118664672 | 2   | 0 |
| 2015/1/1   | -4   | 64 | 2.339240832 | 1.9 | 0 |
| 2015/1/2   | -5.5 | 65 | 2.1324071   | 2.3 | 0 |
| 2015/1/3   | -5   | 52 | 1.768786849 | 3   | 0 |
| 2015/1/4   | -2.7 | 67 | 2.686271015 | 1.8 | 0 |
| 2015/1/5   | -2.4 | 72 | 2.948592954 | 1.9 | 0 |
| 2015/1/6   | 1.1  | 75 | 3.917414049 | 5.1 | 0 |
| 2015/1/7   | -3.4 | 77 | 2.93756488  | 7.9 | 0 |
| 2015/1/8   | 0.7  | 81 | 4.116330546 | 9.5 | 0 |
| 2015/1/9   | 0.7  | 77 | 3.913054964 | 6.2 | 0 |
| 2015/1/10  | -0.9 | 65 | 2.957136102 | 4.1 | 0 |
| 2015/1/11  | 0.2  | 70 | 3.436955396 | 5.2 | 0 |
| 2015/1/12  | 1    | 76 | 3.942551908 | 5.3 | 0 |
| 2015/1/13  | -0.1 | 65 | 3.125996099 | 4.2 | 0 |
| 2015/1/14  | -1.1 | 65 | 2.916189514 | 1.7 | 0 |

|           |      |    |             |      |   |
|-----------|------|----|-------------|------|---|
| 2015/1/15 | -0.4 | 70 | 3.297227052 | 1.4  | 0 |
| 2015/1/16 | -1.3 | 70 | 3.096950672 | 1.7  | 0 |
| 2015/1/17 | -3.9 | 80 | 2.945046002 | 5.6  | 0 |
| 2015/1/18 | -4.9 | 70 | 2.398307822 | 5.4  | 0 |
| 2015/1/19 | -3   | 70 | 2.747523926 | 2.1  | 0 |
| 2015/1/20 | -3.8 | 74 | 2.743710025 | 4    | 0 |
| 2015/1/21 | -2.2 | 67 | 2.782799337 | 1.8  | 0 |
| 2015/1/22 | 0.1  | 77 | 3.754645374 | 2.7  | 0 |
| 2015/1/23 | 0.2  | 87 | 4.271644563 | 5.7  | 0 |
| 2015/1/24 | -0.6 | 74 | 3.43758362  | 3.2  | 0 |
| 2015/1/25 | -1.1 | 73 | 3.275105147 | 1.7  | 0 |
| 2015/1/26 | 1.9  | 77 | 4.247484466 | 4.6  | 0 |
| 2015/1/27 | 0.9  | 71 | 3.658012781 | 6.3  | 0 |
| 2015/1/28 | -4.9 | 51 | 1.747338556 | 3    | 0 |
| 2015/1/29 | -2.9 | 53 | 2.095073238 | 2.2  | 0 |
| 2015/1/30 | -0.4 | 70 | 3.297227052 | 3.6  | 0 |
| 2015/1/31 | -0.3 | 65 | 3.083009567 | 3.2  | 0 |
| 2015/2/1  | -1.7 | 73 | 3.140472618 | 7.7  | 0 |
| 2015/2/2  | -2.1 | 74 | 3.095260226 | 8.7  | 0 |
| 2015/2/3  | -4.4 | 59 | 2.095515947 | 5    | 0 |
| 2015/2/4  | -5.9 | 57 | 1.816389466 | 2.3  | 0 |
| 2015/2/5  | -5.2 | 63 | 2.112199384 | 1.7  | 0 |
| 2015/2/6  | -4.1 | 63 | 2.286260085 | 2.7  | 0 |
| 2015/2/7  | 0.2  | 67 | 3.289657307 | 2.7  | 0 |
| 2015/2/8  | 2.4  | 83 | 4.736425265 | 8.2  | 0 |
| 2015/2/9  | -4.9 | 48 | 1.644553935 | 4.5  | 0 |
| 2015/2/10 | -6.7 | 60 | 1.803453172 | 2.8  | 0 |
| 2015/2/11 | -2.7 | 68 | 2.726364612 | 2.9  | 0 |
| 2015/2/12 | -1.5 | 76 | 3.315683774 | 2    | 0 |
| 2015/2/13 | -2.7 | 87 | 3.48814296  | 2.7  | 0 |
| 2015/2/14 | -0.9 | 70 | 3.18460811  | 6.5  | 0 |
| 2015/2/15 | 0.6  | 69 | 3.482487917 | 10.7 | 0 |
| 2015/2/16 | 1.8  | 76 | 4.163904348 | 7.3  | 0 |
| 2015/2/17 | 1.9  | 69 | 3.806187378 | 2.4  | 0 |
| 2015/2/18 | 1.7  | 62 | 3.373823611 | 3.5  | 0 |
| 2015/2/19 | 0.8  | 67 | 3.428326208 | 2.4  | 0 |
| 2015/2/20 | 0.3  | 55 | 2.71915274  | 2.8  | 0 |
| 2015/2/21 | -0.1 | 58 | 2.789350366 | 2.2  | 0 |
| 2015/2/22 | 1.8  | 77 | 4.218692563 | 7.5  | 0 |
| 2015/2/23 | 4.3  | 61 | 3.95466181  | 4.2  | 0 |
| 2015/2/24 | 0.7  | 70 | 3.557322694 | 2.8  | 0 |
| 2015/2/25 | -0.3 | 74 | 3.509887814 | 1.5  | 0 |
| 2015/2/26 | 0.6  | 68 | 3.432017078 | 3.7  | 0 |
| 2015/2/27 | 2.3  | 79 | 4.477735652 | 5.7  | 0 |
| 2015/2/28 | 0.3  | 73 | 3.609057273 | 5.4  | 0 |
| 2015/3/1  | -0.3 | 78 | 3.69961148  | 4.4  | 0 |
| 2015/3/2  | 1.5  | 76 | 4.079657332 | 6.1  | 0 |
| 2015/3/3  | 2.3  | 53 | 3.004050501 | 3.1  | 0 |
| 2015/3/4  | 1    | 85 | 4.409433055 | 2.5  | 0 |
| 2015/3/5  | 0.8  | 81 | 4.144692878 | 3.6  | 0 |



|           |      |    |             |     |   |
|-----------|------|----|-------------|-----|---|
| 2015/3/6  | 1.4  | 74 | 3.945278685 | 2.2 | 0 |
| 2015/3/7  | 1.5  | 85 | 4.562774648 | 5.1 | 0 |
| 2015/3/8  | 3.2  | 66 | 3.975170045 | 1.8 | 0 |
| 2015/3/9  | 4.7  | 74 | 4.926762423 | 7.2 | 0 |
| 2015/3/10 | 3.6  | 87 | 5.382579697 | 4.8 | 0 |
| 2015/3/11 | 0.5  | 65 | 3.258116454 | 4.1 | 0 |
| 2015/3/12 | 0.8  | 61 | 3.12131192  | 2.8 | 0 |
| 2015/3/13 | 0.9  | 83 | 4.276268462 | 3.1 | 0 |
| 2015/3/14 | 2.2  | 71 | 3.997108533 | 2.1 | 0 |
| 2015/3/15 | 2.9  | 57 | 3.364463266 | 2.6 | 0 |
| 2015/3/16 | 6    | 60 | 4.352608505 | 3.7 | 0 |
| 2015/3/17 | 6.7  | 69 | 5.240172059 | 3.5 | 0 |
| 2015/3/18 | 5.3  | 57 | 3.948723614 | 3.2 | 0 |
| 2015/3/19 | 4.7  | 59 | 3.928094364 | 2   | 0 |
| 2015/3/20 | 3.9  | 73 | 4.608000389 | 2.5 | 0 |
| 2015/3/21 | 5    | 57 | 3.871165638 | 2   | 0 |
| 2015/3/22 | 5.4  | 64 | 4.463017998 | 2.7 | 0 |
| 2015/3/23 | 2.1  | 53 | 2.963583447 | 4   | 0 |
| 2015/3/24 | 1.6  | 61 | 3.296867554 | 5.5 | 0 |
| 2015/3/25 | 2.8  | 64 | 3.752254414 | 7.9 | 0 |
| 2015/3/26 | 5.4  | 47 | 3.277528842 | 2.2 | 0 |
| 2015/3/27 | 8.3  | 58 | 4.886150023 | 1.8 | 0 |
| 2015/3/28 | 10   | 54 | 5.071444915 | 2.4 | 0 |
| 2015/3/29 | 8.6  | 66 | 5.668405414 | 3.7 | 0 |
| 2015/3/30 | 8.5  | 63 | 5.376097539 | 2.3 | 0 |
| 2015/3/31 | 7.7  | 66 | 5.348881022 | 3.5 | 0 |
| 2015/4/1  | 5.4  | 66 | 4.60248731  | 3.2 | 0 |
| 2015/4/2  | 6.9  | 47 | 3.616245344 | 1.9 | 0 |
| 2015/4/3  | 6.4  | 77 | 5.734213422 | 8.4 | 0 |
| 2015/4/4  | 7    | 53 | 4.104536301 | 4.8 | 0 |
| 2015/4/5  | 6.7  | 67 | 5.088283014 | 9.4 | 0 |
| 2015/4/6  | 8.2  | 69 | 5.775511872 | 4   | 0 |
| 2015/4/7  | 2    | 48 | 2.665837604 | 5.3 | 0 |
| 2015/4/8  | 2.2  | 42 | 2.364486738 | 3.9 | 0 |
| 2015/4/9  | 4    | 43 | 2.732494408 | 3   | 0 |
| 2015/4/10 | 5.5  | 66 | 4.632942913 | 6   | 0 |
| 2015/4/11 | 8.4  | 69 | 5.850364972 | 4   | 0 |
| 2015/4/12 | 7.9  | 54 | 4.433317068 | 3.2 | 0 |
| 2015/4/13 | 6.8  | 51 | 3.89851864  | 4   | 0 |
| 2015/4/14 | 10.8 | 66 | 6.520223231 | 4.9 | 0 |
| 2015/4/15 | 8.7  | 84 | 7.260796988 | 2   | 0 |
| 2015/4/16 | 5.9  | 76 | 5.477214173 | 2.7 | 0 |
| 2015/4/17 | 6    | 73 | 5.295673681 | 8   | 0 |
| 2015/4/18 | 9    | 59 | 5.198848131 | 3.6 | 0 |
| 2015/4/19 | 7.3  | 65 | 5.133007388 | 5   | 0 |
| 2015/4/20 | 6.6  | 76 | 5.734224227 | 5.6 | 0 |
| 2015/4/21 | 7.9  | 75 | 6.157384817 | 4.7 | 0 |
| 2015/4/22 | 11.1 | 56 | 5.637825452 | 2.3 | 1 |
| 2015/4/23 | 12.9 | 41 | 4.61861431  | 3.4 | 0 |
| 2015/4/24 | 11.4 | 55 | 5.642491848 | 5.1 | 0 |

|           |      |    |             |     |   |
|-----------|------|----|-------------|-----|---|
| 2015/4/25 | 11.6 | 36 | 3.739864606 | 2.9 | 0 |
| 2015/4/26 | 15.7 | 27 | 3.61065137  | 4.1 | 0 |
| 2015/4/27 | 15.2 | 53 | 6.875752051 | 4.3 | 0 |
| 2015/4/28 | 12.7 | 71 | 7.899494424 | 2.6 | 1 |
| 2015/4/29 | 14.7 | 53 | 6.669430949 | 2.3 | 0 |
| 2015/4/30 | 16.1 | 49 | 6.713070284 | 2.4 | 0 |
| 2015/5/1  | 13.7 | 51 | 6.036108204 | 2.9 | 0 |
| 2015/5/2  | 16   | 30 | 4.085298066 | 5.5 | 0 |
| 2015/5/3  | 17.1 | 48 | 6.983538185 | 3.1 | 0 |
| 2015/5/4  | 15   | 70 | 8.971319043 | 5.8 | 0 |
| 2015/5/5  | 15.3 | 35 | 4.568274375 | 4.9 | 0 |
| 2015/5/6  | 15.8 | 35 | 4.708893626 | 5.1 | 0 |
| 2015/5/7  | 14   | 30 | 3.616753221 | 3   | 0 |
| 2015/5/8  | 12.4 | 42 | 4.586624715 | 3.3 | 0 |
| 2015/5/9  | 9.8  | 65 | 6.027444609 | 4.1 | 0 |
| 2015/5/10 | 10.3 | 61 | 5.838854752 | 4   | 0 |
| 2015/5/11 | 15.3 | 34 | 4.43775225  | 3.1 | 0 |
| 2015/5/12 | 13.6 | 49 | 5.763791562 | 4.5 | 0 |
| 2015/5/13 | 13.7 | 75 | 8.876629712 | 2.9 | 0 |
| 2015/5/14 | 9.7  | 80 | 7.371355586 | 4.5 | 0 |
| 2015/5/15 | 9.6  | 69 | 6.31744778  | 7.2 | 0 |
| 2015/5/16 | 10.4 | 80 | 7.706133581 | 3.5 | 0 |
| 2015/5/17 | 11.6 | 55 | 5.713682037 | 3.8 | 0 |
| 2015/5/18 | 14.9 | 43 | 5.477475383 | 3.3 | 0 |
| 2015/5/19 | 13.4 | 75 | 8.71399965  | 8.7 | 0 |
| 2015/5/20 | 12.5 | 70 | 7.692069446 | 2.2 | 0 |
| 2015/5/21 | 11.4 | 77 | 7.899488587 | 4.1 | 0 |
| 2015/5/22 | 15.2 | 62 | 8.043332588 | 3.9 | 0 |
| 2015/5/23 | 17.8 | 46 | 6.978190182 | 4.1 | 0 |
| 2015/5/24 | 14.5 | 48 | 5.966867485 | 4.1 | 0 |
| 2015/5/25 | 14.7 | 37 | 4.656017832 | 7.7 | 0 |
| 2015/5/26 | 13.9 | 73 | 8.746864834 | 4.5 | 0 |
| 2015/5/27 | 14.4 | 61 | 7.536641346 | 3.9 | 0 |
| 2015/5/28 | 15.7 | 61 | 8.15739754  | 6.6 | 1 |
| 2015/5/29 | 20.2 | 56 | 9.786571958 | 4.1 | 0 |
| 2015/5/30 | 20.6 | 68 | 12.164089   | 5.5 | 0 |
| 2015/5/31 | 17.9 | 61 | 9.308921539 | 3.7 | 0 |
| 2015/6/1  | 20.5 | 36 | 6.402420473 | 3.6 | 0 |
| 2015/6/2  | 18.4 | 58 | 9.117778709 | 3.7 | 0 |
| 2015/6/3  | 17.6 | 73 | 10.9428997  | 3.8 | 0 |
| 2015/6/4  | 12.4 | 76 | 8.299606627 | 5.7 | 0 |
| 2015/6/5  | 10.4 | 80 | 7.706133581 | 6.5 | 1 |
| 2015/6/6  | 11.5 | 65 | 6.710351971 | 5.9 | 0 |
| 2015/6/7  | 13   | 63 | 7.140991314 | 4   | 1 |
| 2015/6/8  | 17   | 62 | 8.966533729 | 3.8 | 0 |
| 2015/6/9  | 15.5 | 80 | 10.56932502 | 8.3 | 0 |
| 2015/6/10 | 15.4 | 79 | 10.37406272 | 3.9 | 0 |
| 2015/6/11 | 13.9 | 85 | 10.18470563 | 4   | 0 |
| 2015/6/12 | 17.4 | 66 | 9.776191309 | 4.3 | 1 |
| 2015/6/13 | 17.6 | 77 | 11.54251065 | 4.4 | 0 |

|           |      |    |             |     |   |
|-----------|------|----|-------------|-----|---|
| 2015/6/14 | 17.9 | 75 | 11.44539533 | 1.9 | 0 |
| 2015/6/15 | 17.7 | 79 | 11.91311689 | 2.3 | 0 |
| 2015/6/16 | 18   | 79 | 12.1277183  | 2.2 | 0 |
| 2015/6/17 | 21   | 65 | 11.90089836 | 4.8 | 0 |
| 2015/6/18 | 20.2 | 57 | 9.961332172 | 5.2 | 0 |
| 2015/6/19 | 19   | 65 | 10.5870676  | 4.7 | 0 |
| 2015/6/20 | 16.6 | 77 | 10.87168741 | 4.3 | 0 |
| 2015/6/21 | 18.4 | 66 | 10.37540336 | 2.8 | 0 |
| 2015/6/22 | 17.4 | 77 | 11.40555653 | 2.2 | 0 |
| 2015/6/23 | 16.7 | 88 | 12.49967578 | 2.4 | 0 |
| 2015/6/24 | 16.4 | 83 | 11.578659   | 1.9 | 1 |
| 2015/6/25 | 17.4 | 80 | 11.84992886 | 1.8 | 0 |
| 2015/6/26 | 19.6 | 74 | 12.48593429 | 2.7 | 0 |
| 2015/6/27 | 17.8 | 70 | 10.61898506 | 2.9 | 0 |
| 2015/6/28 | 15.1 | 77 | 9.92871639  | 1.5 | 1 |
| 2015/6/29 | 15.5 | 84 | 11.09779128 | 1.8 | 0 |
| 2015/6/30 | 15.8 | 86 | 11.57042434 | 4.7 | 0 |
| 2015/7/1  | 17   | 84 | 12.14820699 | 4.8 | 0 |
| 2015/7/2  | 18.6 | 76 | 12.08973247 | 4.3 | 0 |
| 2015/7/3  | 17.8 | 69 | 10.46728527 | 3.9 | 0 |
| 2015/7/4  | 16.2 | 76 | 10.47512445 | 2.6 | 0 |
| 2015/7/5  | 18.1 | 71 | 10.9645483  | 3.2 | 0 |
| 2015/7/6  | 19.1 | 71 | 11.63269447 | 2.5 | 0 |
| 2015/7/7  | 16.7 | 74 | 10.511091   | 5.2 | 0 |
| 2015/7/8  | 15.7 | 63 | 8.424853197 | 4.3 | 0 |
| 2015/7/9  | 18.2 | 62 | 9.631687581 | 2.1 | 0 |
| 2015/7/10 | 19.6 | 66 | 11.13610356 | 2.2 | 0 |
| 2015/7/11 | 22   | 62 | 12.02698096 | 2   | 0 |
| 2015/7/12 | 24.8 | 60 | 13.65022499 | 1.8 | 0 |
| 2015/7/13 | 23.8 | 61 | 13.11510472 | 3.6 | 0 |
| 2015/7/14 | 25.5 | 68 | 16.0903416  | 4.9 | 0 |
| 2015/7/15 | 17   | 73 | 10.55737036 | 5.5 | 0 |
| 2015/7/16 | 16.9 | 63 | 9.05669945  | 5   | 0 |
| 2015/7/17 | 21.3 | 54 | 10.06029616 | 2.1 | 0 |
| 2015/7/18 | 21.2 | 75 | 13.8919563  | 2.1 | 0 |
| 2015/7/19 | 21.5 | 84 | 15.83142441 | 2   | 0 |
| 2015/7/20 | 22.2 | 74 | 14.52086161 | 2.3 | 0 |
| 2015/7/21 | 22.2 | 80 | 15.69822876 | 2.5 | 0 |
| 2015/7/22 | 23.6 | 86 | 18.28132709 | 3.2 | 0 |
| 2015/7/23 | 23.9 | 86 | 18.59532538 | 2.1 | 0 |
| 2015/7/24 | 23.1 | 82 | 16.94170904 | 2.7 | 0 |
| 2015/7/25 | 23   | 84 | 17.25613708 | 4.3 | 0 |
| 2015/7/26 | 23.1 | 86 | 17.76813387 | 2.9 | 0 |
| 2015/7/27 | 25.1 | 79 | 18.27855846 | 2   | 0 |
| 2015/7/28 | 25.1 | 77 | 17.81581015 | 2.3 | 0 |
| 2015/7/29 | 25   | 79 | 18.17614461 | 1.8 | 0 |
| 2015/7/30 | 25.4 | 77 | 18.11818025 | 1.9 | 0 |
| 2015/7/31 | 26.4 | 74 | 18.41173786 | 2.7 | 0 |
| 2015/8/1  | 23.3 | 78 | 16.3000979  | 4.4 | 0 |
| 2015/8/2  | 23.5 | 70 | 14.79578619 | 2.2 | 0 |

|           |      |    |             |     |   |
|-----------|------|----|-------------|-----|---|
| 2015/8/3  | 23.9 | 75 | 16.21685353 | 2.2 | 0 |
| 2015/8/4  | 26.6 | 71 | 17.86267396 | 3.7 | 0 |
| 2015/8/5  | 27.9 | 65 | 17.57037453 | 3.1 | 0 |
| 2015/8/6  | 24.7 | 87 | 19.68166618 | 2.2 | 0 |
| 2015/8/7  | 23.7 | 79 | 16.88898949 | 2.2 | 0 |
| 2015/8/8  | 23.1 | 70 | 14.46243454 | 3.9 | 0 |
| 2015/8/9  | 24   | 70 | 15.22175844 | 4.3 | 0 |
| 2015/8/10 | 25.5 | 77 | 18.21994564 | 3.5 | 0 |
| 2015/8/11 | 24.1 | 82 | 17.9324714  | 2.1 | 0 |
| 2015/8/12 | 23.6 | 80 | 17.00588567 | 2.4 | 0 |
| 2015/8/13 | 23.7 | 76 | 16.24763546 | 2   | 0 |
| 2015/8/14 | 24   | 68 | 14.78685105 | 3.3 | 0 |
| 2015/8/15 | 22.8 | 79 | 16.0445425  | 1.8 | 0 |
| 2015/8/16 | 23   | 79 | 16.22898606 | 1.6 | 0 |
| 2015/8/17 | 23.5 | 74 | 15.64125968 | 4.2 | 0 |
| 2015/8/18 | 18.4 | 87 | 13.67666806 | 2.2 | 0 |
| 2015/8/19 | 19.4 | 81 | 13.50745615 | 4.1 | 0 |
| 2015/8/20 | 20.5 | 77 | 13.69406601 | 2.6 | 0 |
| 2015/8/21 | 21.7 | 73 | 13.91807752 | 1.8 | 0 |
| 2015/8/22 | 23.2 | 72 | 14.96073625 | 2.7 | 0 |
| 2015/8/23 | 21   | 70 | 12.81635208 | 3.2 | 0 |
| 2015/8/24 | 20.5 | 63 | 11.20423583 | 2.6 | 0 |
| 2015/8/25 | 19.6 | 55 | 9.280086299 | 2   | 0 |
| 2015/8/26 | 19.4 | 65 | 10.83931666 | 6.1 | 0 |
| 2015/8/27 | 19.9 | 72 | 12.36396108 | 4.4 | 0 |
| 2015/8/28 | 19.6 | 65 | 10.96737472 | 3.5 | 0 |
| 2015/8/29 | 19.8 | 66 | 11.2674553  | 4   | 0 |
| 2015/8/30 | 19.8 | 71 | 12.1210504  | 2.9 | 0 |
| 2015/8/31 | 21.8 | 74 | 14.19034499 | 1.8 | 0 |
| 2015/9/1  | 21.8 | 73 | 13.99858357 | 1.9 | 1 |
| 2015/9/2  | 19.6 | 82 | 13.83576503 | 4   | 0 |
| 2015/9/3  | 22.5 | 67 | 13.37562765 | 2.3 | 0 |
| 2015/9/4  | 19.8 | 79 | 13.48680256 | 3.2 | 0 |
| 2015/9/5  | 18.1 | 67 | 10.34682727 | 3   | 0 |
| 2015/9/6  | 17.7 | 67 | 10.10352952 | 1.7 | 0 |
| 2015/9/7  | 19.4 | 67 | 11.1728341  | 2   | 0 |
| 2015/9/8  | 19.7 | 64 | 10.86217046 | 2.1 | 0 |
| 2015/9/9  | 19   | 62 | 10.09843371 | 2   | 0 |
| 2015/9/10 | 20.6 | 63 | 11.26967069 | 7.4 | 0 |
| 2015/9/11 | 21.9 | 67 | 12.92227217 | 2.8 | 0 |
| 2015/9/12 | 20.8 | 74 | 13.39227296 | 2.7 | 0 |
| 2015/9/13 | 15.9 | 85 | 11.50526591 | 1.7 | 0 |
| 2015/9/14 | 15.7 | 78 | 10.43077063 | 1.4 | 0 |
| 2015/9/15 | 16.9 | 67 | 9.631727986 | 2.3 | 0 |
| 2015/9/16 | 18.4 | 71 | 11.16141876 | 2.3 | 0 |
| 2015/9/17 | 18.8 | 62 | 9.979954004 | 2.9 | 0 |
| 2015/9/18 | 16.9 | 76 | 10.92554219 | 2.2 | 0 |
| 2015/9/19 | 16.5 | 82 | 11.50821897 | 1.1 | 0 |
| 2015/9/20 | 18.4 | 77 | 12.10463725 | 3.7 | 0 |
| 2015/9/21 | 18.7 | 75 | 12.00141001 | 1.6 | 0 |

|            |      |    |             |     |   |
|------------|------|----|-------------|-----|---|
| 2015/9/22  | 19.3 | 75 | 12.43358429 | 2.5 | 0 |
| 2015/9/23  | 19.3 | 71 | 11.77045979 | 1.6 | 0 |
| 2015/9/24  | 19   | 73 | 11.8900913  | 3.1 | 0 |
| 2015/9/25  | 18.8 | 69 | 11.106723   | 4.4 | 0 |
| 2015/9/26  | 18.1 | 76 | 11.73669959 | 4   | 0 |
| 2015/9/27  | 17.8 | 73 | 11.07408442 | 3.1 | 0 |
| 2015/9/28  | 15.3 | 67 | 8.744982376 | 3   | 0 |
| 2015/9/29  | 12.9 | 68 | 7.660140807 | 4.4 | 0 |
| 2015/9/30  | 13.4 | 62 | 7.203573044 | 4.8 | 0 |
| 2015/10/1  | 14.7 | 69 | 8.682844066 | 5.8 | 0 |
| 2015/10/2  | 15.4 | 59 | 7.747717726 | 6.4 | 0 |
| 2015/10/3  | 14.2 | 48 | 5.858257068 | 4.2 | 0 |
| 2015/10/4  | 11.8 | 57 | 5.996037544 | 3.1 | 0 |
| 2015/10/5  | 11.5 | 70 | 7.226532892 | 1.6 | 0 |
| 2015/10/6  | 12.3 | 66 | 7.162825632 | 1.7 | 0 |
| 2015/10/7  | 13.8 | 66 | 7.85965044  | 2.7 | 0 |
| 2015/10/8  | 11.7 | 70 | 7.317632577 | 9.6 | 0 |
| 2015/10/9  | 12.4 | 75 | 8.190401277 | 7   | 0 |
| 2015/10/10 | 14.3 | 57 | 6.999444068 | 3.8 | 0 |
| 2015/10/11 | 14.5 | 65 | 8.080133052 | 6.3 | 0 |
| 2015/10/12 | 12.1 | 60 | 6.430993015 | 3.1 | 0 |
| 2015/10/13 | 8.4  | 68 | 5.765577074 | 3   | 0 |
| 2015/10/14 | 8.5  | 58 | 4.949423131 | 3.4 | 0 |
| 2015/10/15 | 10.1 | 59 | 5.576292608 | 2.7 | 0 |
| 2015/10/16 | 11.2 | 67 | 6.787797598 | 1.3 | 0 |
| 2015/10/17 | 13.2 | 70 | 8.03321847  | 1.6 | 0 |
| 2015/10/18 | 14   | 60 | 7.233506441 | 4.7 | 0 |
| 2015/10/19 | 9.9  | 46 | 4.292772714 | 3.6 | 0 |
| 2015/10/20 | 9.1  | 66 | 5.852989783 | 3.7 | 0 |
| 2015/10/21 | 9.2  | 48 | 4.284019649 | 2.8 | 0 |
| 2015/10/22 | 8.3  | 50 | 4.212198296 | 3.2 | 0 |
| 2015/10/23 | 10.8 | 52 | 5.137145576 | 2.9 | 0 |
| 2015/10/24 | 10.6 | 65 | 6.340893505 | 5   | 0 |
| 2015/10/25 | 4.4  | 67 | 4.372658973 | 10  | 0 |
| 2015/10/26 | 6.5  | 51 | 3.822904772 | 5.1 | 0 |
| 2015/10/27 | 9.3  | 69 | 6.197740263 | 4.9 | 0 |
| 2015/10/28 | 12   | 57 | 6.071436467 | 4.4 | 0 |
| 2015/10/29 | 7.5  | 55 | 4.400035692 | 2.5 | 0 |
| 2015/10/30 | 6.3  | 61 | 4.513052472 | 2.5 | 0 |
| 2015/10/31 | 6.7  | 51 | 3.873170653 | 2.3 | 0 |
| 2015/11/1  | 8.3  | 49 | 4.12795433  | 1.8 | 0 |
| 2015/11/2  | 8.7  | 62 | 5.359159682 | 1.7 | 0 |
| 2015/11/3  | 9.1  | 67 | 5.941671446 | 2.8 | 0 |
| 2015/11/4  | 11.4 | 42 | 4.308811956 | 3.1 | 0 |
| 2015/11/5  | 13   | 57 | 6.460896903 | 2.4 | 0 |
| 2015/11/6  | 8.6  | 57 | 4.89544104  | 4.3 | 0 |
| 2015/11/7  | 4    | 50 | 3.177319079 | 2.2 | 0 |
| 2015/11/8  | 4.3  | 71 | 4.602967024 | 1.2 | 0 |
| 2015/11/9  | 8.5  | 73 | 6.229446355 | 1.7 | 0 |
| 2015/11/10 | 4.9  | 89 | 6.004548485 | 1.8 | 0 |

|            |      |    |             |     |   |
|------------|------|----|-------------|-----|---|
| 2015/11/11 | 5.3  | 78 | 5.403516525 | 2.8 | 0 |
| 2015/11/12 | 5.3  | 69 | 4.780033849 | 1.5 | 0 |
| 2015/11/13 | 5.2  | 69 | 4.748558056 | 1.4 | 0 |
| 2015/11/14 | 9.4  | 76 | 6.870203768 | 5.5 | 0 |
| 2015/11/15 | 11   | 92 | 9.204043771 | 3.4 | 0 |
| 2015/11/16 | 10   | 70 | 6.57409526  | 3.3 | 0 |
| 2015/11/17 | 8.9  | 74 | 6.478967481 | 3   | 0 |
| 2015/11/18 | 4.8  | 52 | 3.485095592 | 5.1 | 0 |
| 2015/11/19 | 2.9  | 53 | 3.128360581 | 2.3 | 0 |
| 2015/11/20 | 4.2  | 68 | 4.379198888 | 1.6 | 0 |
| 2015/11/21 | 3.8  | 67 | 4.201078438 | 4.3 | 0 |
| 2015/11/22 | 1.6  | 43 | 2.324021391 | 4.5 | 0 |
| 2015/11/23 | 1.8  | 46 | 2.520257895 | 2.4 | 0 |
| 2015/11/24 | -0.2 | 87 | 4.155170549 | 2.5 | 0 |
| 2015/11/25 | -1.1 | 75 | 3.364834055 | 2.2 | 0 |
| 2015/11/26 | -1.6 | 75 | 3.249214813 | 1.9 | 0 |
| 2015/11/27 | 2.8  | 85 | 4.983462893 | 3.1 | 0 |
| 2015/11/28 | 2.2  | 81 | 4.560081566 | 4   | 0 |
| 2015/11/29 | 2.3  | 60 | 3.400811887 | 2.4 | 0 |
| 2015/11/30 | 1.7  | 73 | 3.972405219 | 2.8 | 0 |
| 2015/12/1  | 0.7  | 60 | 3.049133738 | 5.4 | 0 |
| 2015/12/2  | 2.1  | 62 | 3.466833466 | 2.7 | 0 |
| 2015/12/3  | 7    | 75 | 5.808306086 | 5   | 0 |
| 2015/12/4  | 0.9  | 65 | 3.34888494  | 2.5 | 0 |
| 2015/12/5  | -0.5 | 77 | 3.601871536 | 2   | 0 |
| 2015/12/6  | -0.9 | 59 | 2.684169693 | 2.7 | 0 |
| 2015/12/7  | 1.3  | 68 | 3.600710391 | 2.9 | 0 |
| 2015/12/8  | 1.3  | 62 | 3.28300065  | 1.5 | 1 |
| 2015/12/9  | 2.8  | 64 | 3.752254414 | 2   | 0 |
| 2015/12/10 | 6.3  | 68 | 5.03094374  | 2   | 0 |
| 2015/12/11 | 5    | 78 | 5.297384557 | 3.6 | 0 |
| 2015/12/12 | 2.5  | 64 | 3.676980107 | 2.6 | 0 |
| 2015/12/13 | 2.5  | 67 | 3.84933855  | 1.9 | 0 |
| 2015/12/14 | 2.1  | 56 | 3.131333453 | 1.5 | 0 |
| 2015/12/15 | 5.4  | 74 | 5.16036456  | 3.8 | 0 |
| 2015/12/16 | 6    | 71 | 5.150586731 | 3   | 0 |
| 2015/12/17 | 1    | 82 | 4.253806006 | 4.5 | 0 |
| 2015/12/18 | -0.2 | 78 | 3.72532532  | 2.1 | 0 |
| 2015/12/19 | -1.2 | 55 | 2.450379385 | 6.2 | 0 |
| 2015/12/20 | 1.7  | 58 | 3.156157572 | 2.7 | 0 |
| 2015/12/21 | 2.8  | 87 | 5.100720844 | 1.6 | 0 |
| 2015/12/22 | 0.5  | 65 | 3.258116454 | 4.7 | 0 |
| 2015/12/23 | 0    | 70 | 3.389814865 | 2.6 | 0 |
| 2015/12/24 | 4.2  | 67 | 4.314798905 | 1.3 | 0 |
| 2015/12/25 | -1   | 80 | 3.614277371 | 4.6 | 0 |
| 2015/12/26 | -4.7 | 67 | 2.328856976 | 2.1 | 0 |
| 2015/12/27 | -6.2 | 59 | 1.839456976 | 4.3 | 0 |
| 2015/12/28 | -5.4 | 72 | 2.379238169 | 2.6 | 0 |
| 2015/12/29 | -4.6 | 57 | 1.99558064  | 3.4 | 0 |
| 2015/12/30 | -3.6 | 73 | 2.745553649 | 1.6 | 0 |

|            |      |    |             |     |   |
|------------|------|----|-------------|-----|---|
| 2015/12/31 | -1.6 | 63 | 2.729340443 | 1.9 | 0 |
| 2016/1/1   | -1.1 | 59 | 2.64700279  | 3.5 | 0 |
| 2016/1/2   | 1.6  | 75 | 4.053525681 | 2.6 | 0 |
| 2016/1/3   | 0.3  | 52 | 2.570835318 | 2.3 | 0 |
| 2016/1/4   | -1.7 | 57 | 2.452149852 | 2.3 | 0 |
| 2016/1/5   | -3.9 | 61 | 2.245597577 | 2.8 | 0 |
| 2016/1/6   | -2.3 | 66 | 2.722011684 | 2.4 | 0 |
| 2016/1/7   | -2.7 | 58 | 2.32542864  | 3   | 0 |
| 2016/1/8   | -2.5 | 68 | 2.76518906  | 1.7 | 0 |
| 2016/1/9   | -3.6 | 62 | 2.331840085 | 2.2 | 0 |
| 2016/1/10  | -4.2 | 69 | 2.486116934 | 2.4 | 0 |
| 2016/1/11  | -6.7 | 48 | 1.442762537 | 3.4 | 0 |
| 2016/1/12  | -6.4 | 68 | 2.089303007 | 2.2 | 0 |
| 2016/1/13  | -4.2 | 60 | 2.161840812 | 1.6 | 0 |
| 2016/1/14  | -3.7 | 72 | 2.688689462 | 3.1 | 0 |
| 2016/1/15  | -6.3 | 69 | 2.135578666 | 1.9 | 0 |
| 2016/1/16  | -5   | 68 | 2.313028957 | 1.9 | 0 |
| 2016/1/17  | -5.1 | 73 | 2.46523038  | 1.7 | 0 |
| 2016/1/18  | -5.9 | 74 | 2.358119657 | 1.9 | 0 |
| 2016/1/19  | -1.4 | 80 | 3.514707541 | 3.6 | 0 |
| 2016/1/20  | -0.5 | 60 | 2.806653145 | 5.7 | 0 |
| 2016/1/21  | -2.1 | 65 | 2.718809658 | 3.7 | 0 |
| 2016/1/22  | -2.7 | 72 | 2.886739001 | 3.1 | 0 |
| 2016/1/23  | -3.7 | 59 | 2.203231642 | 1.5 | 0 |
| 2016/1/24  | -5.7 | 68 | 2.198669556 | 1.6 | 0 |
| 2016/1/25  | -6.7 | 73 | 2.194201359 | 1.8 | 0 |
| 2016/1/26  | 0    | 66 | 3.196111159 | 2.4 | 1 |
| 2016/1/27  | -1.7 | 71 | 3.054432272 | 2.9 | 0 |
| 2016/1/28  | -3.9 | 62 | 2.282410652 | 3.8 | 0 |
| 2016/1/29  | -5   | 48 | 1.632726322 | 4.4 | 0 |
| 2016/1/30  | -5.8 | 66 | 2.118546126 | 1.5 | 0 |
| 2016/1/31  | -5.6 | 55 | 1.791298642 | 3.7 | 0 |
| 2016/2/1   | -5.5 | 45 | 1.476281839 | 3.7 | 0 |
| 2016/2/2   | -4.5 | 58 | 2.045248423 | 3.4 | 0 |
| 2016/2/3   | -3.5 | 62 | 2.348523772 | 2.6 | 0 |
| 2016/2/4   | -0.4 | 65 | 3.061710834 | 2.5 | 0 |
| 2016/2/5   | -2.4 | 66 | 2.702876874 | 2.4 | 0 |
| 2016/2/6   | -4.9 | 61 | 2.089953959 | 2   | 0 |
| 2016/2/7   | -4.7 | 60 | 2.085543561 | 3.2 | 0 |
| 2016/2/8   | -3.5 | 60 | 2.27276494  | 3.2 | 0 |
| 2016/2/9   | 1.8  | 69 | 3.780386842 | 4.5 | 0 |
| 2016/2/10  | -1.7 | 79 | 3.398593655 | 7.7 | 0 |
| 2016/2/11  | -1.8 | 59 | 2.520440733 | 4.4 | 0 |
| 2016/2/12  | 0.2  | 68 | 3.33875667  | 3.7 | 0 |
| 2016/2/13  | 4.8  | 83 | 5.562748733 | 3.6 | 0 |
| 2016/2/14  | 3.4  | 87 | 5.310870845 | 5.1 | 0 |
| 2016/2/15  | -5.7 | 57 | 1.843002422 | 3.9 | 0 |
| 2016/2/16  | -5.4 | 66 | 2.180968322 | 1.7 | 0 |
| 2016/2/17  | -4.4 | 67 | 2.379653703 | 3   | 0 |
| 2016/2/18  | -0.6 | 76 | 3.530491285 | 2.1 | 0 |

|           |      |    |             |     |   |
|-----------|------|----|-------------|-----|---|
| 2016/2/19 | 2.5  | 72 | 4.136602621 | 2.7 | 0 |
| 2016/2/20 | 1.5  | 57 | 3.059742999 | 2.4 | 0 |
| 2016/2/21 | -0.5 | 80 | 3.742204193 | 4.2 | 0 |
| 2016/2/22 | -2.9 | 59 | 2.33225134  | 3.6 | 0 |
| 2016/2/23 | -1.9 | 78 | 3.308786472 | 4.2 | 0 |
| 2016/2/24 | -6.8 | 74 | 2.20800488  | 4.3 | 0 |
| 2016/2/25 | -6.4 | 60 | 1.843502653 | 2.8 | 0 |
| 2016/2/26 | -5.6 | 66 | 2.149558371 | 2.3 | 0 |
| 2016/2/27 | -4.7 | 60 | 2.085543561 | 2.5 | 0 |
| 2016/2/28 | -3.4 | 49 | 1.869359469 | 2.7 | 0 |
| 2016/2/29 | 0.7  | 69 | 3.506503799 | 6.4 | 0 |
| 2016/3/1  | -2   | 75 | 3.159238353 | 7.3 | 0 |
| 2016/3/2  | -3.3 | 63 | 2.420627935 | 2.5 | 0 |
| 2016/3/3  | -3.4 | 76 | 2.899414687 | 2.2 | 0 |
| 2016/3/4  | -2.5 | 67 | 2.724524515 | 2.7 | 0 |
| 2016/3/5  | -0.9 | 54 | 2.456697685 | 2.1 | 0 |
| 2016/3/6  | 3.8  | 79 | 4.953510397 | 8.7 | 0 |
| 2016/3/7  | 4.7  | 66 | 4.394139458 | 2.6 | 0 |
| 2016/3/8  | 3.1  | 59 | 3.529739703 | 4.7 | 0 |
| 2016/3/9  | -0.6 | 49 | 2.276237802 | 4.2 | 0 |
| 2016/3/10 | -2   | 67 | 2.822252928 | 1.4 | 0 |
| 2016/3/11 | -2.4 | 63 | 2.580018834 | 2.6 | 0 |
| 2016/3/12 | -2   | 59 | 2.485267504 | 2.4 | 0 |
| 2016/3/13 | -0.7 | 64 | 2.952452759 | 3.6 | 0 |
| 2016/3/14 | 2.1  | 69 | 3.858250148 | 2.4 | 0 |
| 2016/3/15 | 1    | 49 | 2.541908467 | 5.3 | 0 |
| 2016/3/16 | 5.4  | 49 | 3.416998155 | 3.8 | 0 |
| 2016/3/17 | 7.9  | 48 | 3.940726283 | 2.6 | 0 |
| 2016/3/18 | 8.4  | 58 | 4.917698092 | 3.6 | 0 |
| 2016/3/19 | 5.7  | 82 | 5.832413066 | 4.2 | 0 |
| 2016/3/20 | 1.1  | 62 | 3.238395614 | 6.1 | 0 |
| 2016/3/21 | 0.1  | 62 | 3.02322095  | 3.7 | 0 |
| 2016/3/22 | 2.4  | 47 | 2.682072138 | 2.9 | 0 |
| 2016/3/23 | 1.8  | 68 | 3.725598627 | 3.7 | 0 |
| 2016/3/24 | 1    | 74 | 3.838800542 | 2.4 | 0 |
| 2016/3/25 | 1    | 78 | 4.046303274 | 3.6 | 0 |
| 2016/3/26 | 3.3  | 67 | 4.062610471 | 4.3 | 0 |
| 2016/3/27 | 6.5  | 49 | 3.672986938 | 3.1 | 0 |
| 2016/3/28 | 5.7  | 54 | 3.840857385 | 3.5 | 0 |
| 2016/3/29 | 6.4  | 51 | 3.797985514 | 3.4 | 0 |
| 2016/3/30 | 6.6  | 73 | 5.507873271 | 5.8 | 0 |
| 2016/3/31 | 5.9  | 62 | 4.468253668 | 3.5 | 0 |
| 2016/4/1  | 7    | 61 | 4.72408895  | 3.1 | 0 |
| 2016/4/2  | 4.7  | 61 | 4.061250105 | 7.8 | 0 |
| 2016/4/3  | 7.9  | 55 | 4.515415532 | 4.7 | 0 |
| 2016/4/4  | 7    | 43 | 3.330095489 | 2.6 | 0 |
| 2016/4/5  | 8.5  | 39 | 3.328060381 | 4.4 | 0 |
| 2016/4/6  | 9    | 34 | 2.99594638  | 4.9 | 0 |
| 2016/4/7  | 8.2  | 54 | 4.519965813 | 4.7 | 0 |
| 2016/4/8  | 8.8  | 56 | 4.871679825 | 3.1 | 0 |



|           |      |    |             |      |   |
|-----------|------|----|-------------|------|---|
| 2016/4/9  | 6.6  | 36 | 2.716211476 | 5.7  | 0 |
| 2016/4/10 | 4.3  | 38 | 2.463559816 | 4    | 0 |
| 2016/4/11 | 2.2  | 70 | 3.94081123  | 5.5  | 0 |
| 2016/4/12 | 6.9  | 41 | 3.154597003 | 4.2  | 1 |
| 2016/4/13 | 8.1  | 59 | 4.906746682 | 4.5  | 0 |
| 2016/4/14 | 11   | 74 | 7.403252598 | 3    | 0 |
| 2016/4/15 | 4.7  | 73 | 4.860184552 | 9.2  | 0 |
| 2016/4/16 | 8    | 50 | 4.131516695 | 2.8  | 0 |
| 2016/4/17 | 8.8  | 75 | 6.524571194 | 4.3  | 0 |
| 2016/4/18 | 6.8  | 72 | 5.503791021 | 5.4  | 0 |
| 2016/4/19 | 4.4  | 80 | 5.221085341 | 2.2  | 0 |
| 2016/4/20 | 9.7  | 53 | 4.883523076 | 3.8  | 0 |
| 2016/4/21 | 13.8 | 54 | 6.430623087 | 3.5  | 0 |
| 2016/4/22 | 14.1 | 50 | 6.065037677 | 2.6  | 0 |
| 2016/4/23 | 9.5  | 70 | 6.368299716 | 6.4  | 0 |
| 2016/4/24 | 9.8  | 56 | 5.192875356 | 2.7  | 0 |
| 2016/4/25 | 10.3 | 57 | 5.455979031 | 2.8  | 0 |
| 2016/4/26 | 8.5  | 64 | 5.461432421 | 3.8  | 0 |
| 2016/4/27 | 8.1  | 53 | 4.407755494 | 3.5  | 0 |
| 2016/4/28 | 7.6  | 60 | 4.83124087  | 5.1  | 0 |
| 2016/4/29 | 4.8  | 79 | 5.294664456 | 5.3  | 0 |
| 2016/4/30 | 4.3  | 63 | 4.084322852 | 7.1  | 0 |
| 2016/5/1  | 6.3  | 59 | 4.365083539 | 3    | 0 |
| 2016/5/2  | 9.9  | 53 | 4.946020736 | 3.5  | 0 |
| 2016/5/3  | 16.4 | 60 | 8.370114939 | 7    | 0 |
| 2016/5/4  | 13.6 | 78 | 9.175015139 | 5.6  | 0 |
| 2016/5/5  | 12   | 68 | 7.243117188 | 3.4  | 0 |
| 2016/5/6  | 11.5 | 72 | 7.43300526  | 2.8  | 0 |
| 2016/5/7  | 12.5 | 67 | 7.362409327 | 5.7  | 0 |
| 2016/5/8  | 15.2 | 34 | 4.410859807 | 6.8  | 0 |
| 2016/5/9  | 14.1 | 42 | 5.094631648 | 1.8  | 0 |
| 2016/5/10 | 15.8 | 42 | 5.650672351 | 2.9  | 0 |
| 2016/5/11 | 11.4 | 81 | 8.30985163  | 2.4  | 0 |
| 2016/5/12 | 10.4 | 79 | 7.609806911 | 4.7  | 0 |
| 2016/5/13 | 15.6 | 54 | 7.177684481 | 4.5  | 0 |
| 2016/5/14 | 14.5 | 45 | 5.593938267 | 2.8  | 0 |
| 2016/5/15 | 14.7 | 26 | 3.271796315 | 7.4  | 0 |
| 2016/5/16 | 12.6 | 69 | 7.629450451 | 12.5 | 0 |
| 2016/5/17 | 16.5 | 54 | 7.578583224 | 3.7  | 0 |
| 2016/5/18 | 16   | 56 | 7.625889722 | 2.5  | 0 |
| 2016/5/19 | 17.6 | 51 | 7.645039519 | 3.4  | 0 |
| 2016/5/20 | 19.1 | 47 | 7.700516055 | 1.4  | 0 |
| 2016/5/21 | 19.9 | 43 | 7.384032311 | 1.8  | 0 |
| 2016/5/22 | 18.6 | 61 | 9.70360106  | 2.5  | 0 |
| 2016/5/23 | 17.2 | 64 | 9.367280306 | 2.7  | 0 |
| 2016/5/24 | 16.9 | 55 | 7.906642377 | 5.9  | 0 |
| 2016/5/25 | 16.9 | 71 | 10.20675652 | 7.4  | 0 |
| 2016/5/26 | 19.8 | 56 | 9.560265106 | 3.6  | 0 |
| 2016/5/27 | 17.3 | 47 | 6.920357969 | 3.9  | 0 |
| 2016/5/28 | 15.5 | 55 | 7.266410955 | 3.2  | 0 |

|           |      |    |             |     |   |
|-----------|------|----|-------------|-----|---|
| 2016/5/29 | 14.2 | 67 | 8.17715049  | 3   | 0 |
| 2016/5/30 | 16.2 | 57 | 7.856343334 | 6   | 0 |
| 2016/5/31 | 15.1 | 77 | 9.92871639  | 5   | 0 |
| 2016/6/1  | 11.7 | 80 | 8.363008659 | 4.8 | 0 |
| 2016/6/2  | 10.8 | 64 | 6.322640709 | 6.8 | 0 |
| 2016/6/3  | 11.3 | 78 | 7.952009683 | 1.8 | 1 |
| 2016/6/4  | 13.4 | 83 | 9.643492947 | 3.3 | 0 |
| 2016/6/5  | 12.2 | 66 | 7.118339058 | 5.6 | 0 |
| 2016/6/6  | 14.7 | 58 | 7.298622548 | 2   | 0 |
| 2016/6/7  | 18.6 | 52 | 8.271922215 | 2   | 0 |
| 2016/6/8  | 17.2 | 73 | 10.6845541  | 2.9 | 0 |
| 2016/6/9  | 16.6 | 85 | 12.00121338 | 2   | 0 |
| 2016/6/10 | 14.8 | 82 | 10.38191292 | 5.6 | 0 |
| 2016/6/11 | 15.2 | 75 | 9.729837809 | 3.6 | 0 |
| 2016/6/12 | 16.1 | 70 | 9.590100405 | 8.1 | 0 |
| 2016/6/13 | 16.5 | 80 | 11.2275307  | 8.6 | 0 |
| 2016/6/14 | 15.9 | 77 | 10.42241736 | 6.1 | 0 |
| 2016/6/15 | 16.8 | 70 | 10.00280587 | 6.3 | 0 |
| 2016/6/16 | 15.2 | 79 | 10.24876249 | 6.4 | 0 |
| 2016/6/17 | 16.1 | 88 | 12.05612622 | 4   | 0 |
| 2016/6/18 | 14   | 86 | 10.3680259  | 4.3 | 0 |
| 2016/6/19 | 16.9 | 73 | 10.49427079 | 4   | 0 |
| 2016/6/20 | 17.7 | 85 | 12.81791058 | 5.3 | 0 |
| 2016/6/21 | 20.3 | 72 | 12.65639837 | 3.7 | 0 |
| 2016/6/22 | 19.8 | 73 | 12.46248844 | 2.6 | 0 |
| 2016/6/23 | 19.1 | 65 | 10.64964986 | 3.7 | 0 |
| 2016/6/24 | 17.9 | 64 | 9.766737352 | 4.9 | 0 |
| 2016/6/25 | 15.8 | 82 | 11.03226507 | 7   | 0 |
| 2016/6/26 | 15.8 | 80 | 10.76318543 | 4.9 | 0 |
| 2016/6/27 | 16.5 | 71 | 9.964433498 | 3.4 | 0 |
| 2016/6/28 | 19.5 | 65 | 10.90318343 | 2   | 0 |
| 2016/6/29 | 21.1 | 63 | 11.60181199 | 2   | 0 |
| 2016/6/30 | 21.6 | 65 | 12.32148082 | 3.8 | 0 |
| 2016/7/1  | 22.1 | 66 | 12.87679348 | 2.4 | 0 |
| 2016/7/2  | 20.4 | 82 | 14.49854874 | 6   | 0 |
| 2016/7/3  | 21.2 | 71 | 13.15105197 | 4.3 | 0 |
| 2016/7/4  | 16.5 | 75 | 10.52581003 | 6.1 | 0 |
| 2016/7/5  | 17.7 | 70 | 10.55592636 | 3.1 | 0 |
| 2016/7/6  | 16.8 | 69 | 9.859908642 | 5.4 | 0 |
| 2016/7/7  | 18.6 | 68 | 10.81712905 | 2.3 | 0 |
| 2016/7/8  | 19.5 | 71 | 11.90963114 | 3.1 | 1 |
| 2016/7/9  | 20.9 | 73 | 13.28826713 | 2.3 | 0 |
| 2016/7/10 | 18.4 | 89 | 13.99107423 | 3.3 | 0 |
| 2016/7/11 | 17.8 | 79 | 11.98428314 | 5.2 | 0 |
| 2016/7/12 | 19.6 | 74 | 12.48593429 | 3.1 | 0 |
| 2016/7/13 | 21.8 | 70 | 13.42329932 | 3.5 | 0 |
| 2016/7/14 | 21.2 | 65 | 12.03969546 | 4.7 | 0 |
| 2016/7/15 | 21.6 | 69 | 13.0797258  | 2.3 | 0 |
| 2016/7/16 | 21.9 | 73 | 14.07949057 | 2   | 0 |
| 2016/7/17 | 20.1 | 76 | 13.20441155 | 4.6 | 0 |

|           |      |    |             |     |   |
|-----------|------|----|-------------|-----|---|
| 2016/7/18 | 22   | 72 | 13.9668166  | 2.9 | 0 |
| 2016/7/19 | 19.9 | 87 | 14.9397863  | 2.1 | 1 |
| 2016/7/20 | 20.8 | 77 | 13.93520295 | 2.2 | 0 |
| 2016/7/21 | 21.2 | 73 | 13.52150413 | 2.2 | 0 |
| 2016/7/22 | 20.7 | 73 | 13.13471022 | 2.9 | 0 |
| 2016/7/23 | 20.7 | 69 | 12.41500007 | 4.3 | 0 |
| 2016/7/24 | 20.6 | 68 | 12.164089   | 5.1 | 0 |
| 2016/7/25 | 21.1 | 71 | 13.07505795 | 4.5 | 0 |
| 2016/7/26 | 22.1 | 71 | 13.85230814 | 5.4 | 0 |
| 2016/7/27 | 20.6 | 86 | 15.38399491 | 7.8 | 0 |
| 2016/7/28 | 22.8 | 87 | 17.6693063  | 4   | 0 |
| 2016/7/29 | 23.2 | 88 | 18.28534431 | 4   | 0 |
| 2016/7/30 | 24.6 | 78 | 17.54645275 | 5   | 0 |
| 2016/7/31 | 25.4 | 76 | 17.8828792  | 3.8 | 0 |
| 2016/8/1  | 26.5 | 74 | 18.51434098 | 4.3 | 0 |
| 2016/8/2  | 25.1 | 82 | 18.97268094 | 2.8 | 1 |
| 2016/8/3  | 25   | 80 | 18.40622239 | 2   | 0 |
| 2016/8/4  | 24.9 | 74 | 16.93028626 | 1.9 | 0 |
| 2016/8/5  | 23.5 | 68 | 14.37304944 | 3   | 0 |
| 2016/8/6  | 23.2 | 63 | 13.09064422 | 2.3 | 0 |
| 2016/8/7  | 25.9 | 67 | 16.21220384 | 4.3 | 0 |
| 2016/8/8  | 26.5 | 73 | 18.26414718 | 5.3 | 0 |
| 2016/8/9  | 23   | 70 | 14.38011423 | 6.4 | 0 |
| 2016/8/10 | 22.3 | 68 | 13.4203692  | 4.7 | 0 |
| 2016/8/11 | 23.4 | 66 | 13.87115817 | 2.1 | 0 |
| 2016/8/12 | 24.1 | 69 | 15.08951861 | 2.3 | 0 |
| 2016/8/13 | 24.2 | 60 | 13.19578133 | 4.6 | 0 |
| 2016/8/14 | 24.4 | 64 | 14.23551364 | 5.1 | 0 |
| 2016/8/15 | 24.8 | 72 | 16.38026998 | 3.7 | 0 |
| 2016/8/16 | 24.2 | 79 | 17.37444541 | 4   | 0 |
| 2016/8/17 | 22.2 | 92 | 18.05296308 | 3.3 | 0 |
| 2016/8/18 | 24.5 | 75 | 16.77668611 | 2.3 | 0 |
| 2016/8/19 | 24.3 | 78 | 17.25178694 | 2.5 | 0 |
| 2016/8/20 | 23.4 | 89 | 18.70504662 | 2.1 | 0 |
| 2016/8/21 | 24.7 | 86 | 19.45544014 | 2.6 | 0 |
| 2016/8/22 | 23.9 | 90 | 19.46022423 | 2   | 0 |
| 2016/8/23 | 22.7 | 83 | 16.76074643 | 1.9 | 0 |
| 2016/8/24 | 23.1 | 69 | 14.25582834 | 1.8 | 1 |
| 2016/8/25 | 23.7 | 73 | 15.60628143 | 5.2 | 0 |
| 2016/8/26 | 20.5 | 72 | 12.80484095 | 3.5 | 1 |
| 2016/8/27 | 20.3 | 59 | 10.37121533 | 2.9 | 0 |
| 2016/8/28 | 20.5 | 61 | 10.8485458  | 2.3 | 0 |
| 2016/8/29 | 25.8 | 64 | 15.40005821 | 2.8 | 0 |
| 2016/8/30 | 27.1 | 68 | 17.58841382 | 4.4 | 0 |
| 2016/8/31 | 24.1 | 77 | 16.83902802 | 6   | 0 |
| 2016/9/1  | 25.8 | 67 | 16.12193594 | 3.6 | 0 |
| 2016/9/2  | 24.2 | 76 | 16.71465635 | 2   | 0 |
| 2016/9/3  | 23.5 | 74 | 15.64125968 | 4.4 | 0 |
| 2016/9/4  | 22.8 | 71 | 14.41977871 | 4.5 | 0 |
| 2016/9/5  | 23.7 | 74 | 15.82006611 | 4.7 | 0 |

|            |      |    |             |     |   |
|------------|------|----|-------------|-----|---|
| 2016/9/6   | 23.3 | 87 | 18.18087843 | 3   | 0 |
| 2016/9/7   | 22.6 | 76 | 15.25955598 | 2.7 | 0 |
| 2016/9/8   | 18.5 | 77 | 12.1765383  | 2.7 | 0 |
| 2016/9/9   | 17.9 | 83 | 12.6662375  | 2.1 | 0 |
| 2016/9/10  | 18.6 | 85 | 13.52141131 | 3   | 0 |
| 2016/9/11  | 18.3 | 71 | 11.09545879 | 3.3 | 0 |
| 2016/9/12  | 18.2 | 65 | 10.09773698 | 2.1 | 0 |
| 2016/9/13  | 18.9 | 70 | 11.33440333 | 4.3 | 0 |
| 2016/9/14  | 19.3 | 71 | 11.77045979 | 3.9 | 0 |
| 2016/9/15  | 19.8 | 79 | 13.48680256 | 1.9 | 0 |
| 2016/9/16  | 21   | 68 | 12.45017059 | 2.9 | 0 |
| 2016/9/17  | 18.1 | 75 | 11.58226933 | 3.7 | 0 |
| 2016/9/18  | 15.3 | 74 | 9.658637251 | 2   | 0 |
| 2016/9/19  | 14.9 | 71 | 9.04420354  | 2   | 0 |
| 2016/9/20  | 16.1 | 60 | 8.220086061 | 1.7 | 0 |
| 2016/9/21  | 16.3 | 57 | 7.903852121 | 2   | 0 |
| 2016/9/22  | 16.4 | 70 | 9.765134095 | 4.3 | 0 |
| 2016/9/23  | 16.3 | 88 | 12.20243836 | 2.4 | 0 |
| 2016/9/24  | 18.6 | 78 | 12.40788332 | 1.8 | 0 |
| 2016/9/25  | 20.9 | 66 | 12.01404974 | 3.3 | 0 |
| 2016/9/26  | 20.3 | 63 | 11.07434857 | 2.3 | 0 |
| 2016/9/27  | 19.9 | 59 | 10.13157922 | 3.4 | 0 |
| 2016/9/28  | 19   | 82 | 13.35599297 | 3.3 | 0 |
| 2016/9/29  | 16.1 | 66 | 9.042094668 | 3.4 | 0 |
| 2016/9/30  | 16.6 | 58 | 8.189063247 | 2.3 | 0 |
| 2016/10/1  | 17.6 | 61 | 9.144066875 | 1.9 | 0 |
| 2016/10/2  | 18.4 | 63 | 9.903794115 | 1.8 | 0 |
| 2016/10/3  | 18.1 | 79 | 12.19999036 | 3.3 | 0 |
| 2016/10/4  | 15.5 | 49 | 6.473711578 | 6.5 | 0 |
| 2016/10/5  | 13.3 | 60 | 6.928293245 | 3.1 | 0 |
| 2016/10/6  | 12.7 | 63 | 7.009410545 | 5.6 | 0 |
| 2016/10/7  | 10.9 | 45 | 4.473715265 | 5   | 0 |
| 2016/10/8  | 13.3 | 74 | 8.544895002 | 3.6 | 0 |
| 2016/10/9  | 12.9 | 55 | 6.195702123 | 5.1 | 0 |
| 2016/10/10 | 9.1  | 53 | 4.700128159 | 2.8 | 0 |
| 2016/10/11 | 11.3 | 59 | 6.014981683 | 2.8 | 0 |
| 2016/10/12 | 10.2 | 48 | 4.565497131 | 3.9 | 0 |
| 2016/10/13 | 10.7 | 49 | 4.810331826 | 2.4 | 0 |
| 2016/10/14 | 10.6 | 46 | 4.487401557 | 4   | 0 |
| 2016/10/15 | 11.3 | 56 | 5.709135157 | 1.8 | 0 |
| 2016/10/16 | 15.2 | 70 | 9.081181955 | 1.7 | 0 |
| 2016/10/17 | 16.1 | 74 | 10.13810614 | 3.5 | 0 |
| 2016/10/18 | 12.6 | 70 | 7.740022197 | 3.8 | 0 |
| 2016/10/19 | 11.5 | 67 | 6.916824339 | 1.7 | 0 |
| 2016/10/20 | 7.8  | 71 | 5.791439816 | 6.5 | 0 |
| 2016/10/21 | 5.4  | 56 | 3.905140748 | 5.8 | 0 |
| 2016/10/22 | 7.3  | 65 | 5.133007388 | 2   | 0 |
| 2016/10/23 | 6.5  | 55 | 4.12274044  | 4.6 | 1 |
| 2016/10/24 | 6.5  | 38 | 2.84843885  | 6.7 | 0 |
| 2016/10/25 | 8.4  | 56 | 4.748122296 | 3.1 | 0 |

|            |      |    |             |     |   |
|------------|------|----|-------------|-----|---|
| 2016/10/26 | 10.5 | 58 | 5.622389911 | 4.7 | 0 |
| 2016/10/27 | 6.6  | 43 | 3.244363708 | 4.5 | 0 |
| 2016/10/28 | 8.2  | 46 | 3.850341248 | 2.9 | 0 |
| 2016/10/29 | 4.3  | 48 | 3.11186503  | 6.9 | 0 |
| 2016/10/30 | 3    | 51 | 3.030660105 | 2.9 | 0 |
| 2016/10/31 | 4.3  | 69 | 4.473305981 | 4.2 | 0 |
| 2016/11/1  | 2.7  | 52 | 3.028199616 | 3.3 | 0 |
| 2016/11/2  | 2.9  | 52 | 3.069334909 | 2.1 | 0 |
| 2016/11/3  | 2.4  | 80 | 4.565229171 | 1.7 | 0 |
| 2016/11/4  | 2.8  | 51 | 2.990077736 | 3.6 | 0 |
| 2016/11/5  | 1.8  | 87 | 4.766574714 | 3.3 | 0 |
| 2016/11/6  | 0.9  | 67 | 3.451927553 | 5.6 | 0 |
| 2016/11/7  | 1.8  | 57 | 3.122928261 | 2.9 | 0 |
| 2016/11/8  | 5.5  | 75 | 5.264707855 | 4.9 | 0 |
| 2016/11/9  | -0.1 | 67 | 3.222180595 | 4.2 | 0 |
| 2016/11/10 | 0.5  | 54 | 2.7067429   | 4   | 0 |
| 2016/11/11 | 1.7  | 63 | 3.428240121 | 2.6 | 0 |
| 2016/11/12 | 5    | 81 | 5.501130116 | 2   | 0 |
| 2016/11/13 | 6.9  | 76 | 5.847545663 | 4   | 0 |
| 2016/11/14 | 6.7  | 65 | 4.936393969 | 4.4 | 0 |
| 2016/11/15 | 5.8  | 77 | 5.512926628 | 4.7 | 0 |
| 2016/11/16 | 0.7  | 57 | 2.896677051 | 4.6 | 0 |
| 2016/11/17 | 0.5  | 55 | 2.756867769 | 2.7 | 0 |
| 2016/11/18 | 5.1  | 69 | 4.717263023 | 3.4 | 0 |
| 2016/11/19 | 9.4  | 81 | 7.322190858 | 2.5 | 0 |
| 2016/11/20 | 6.2  | 68 | 4.998094626 | 4.7 | 0 |
| 2016/11/21 | 1    | 51 | 2.645659833 | 3.2 | 0 |
| 2016/11/22 | 0.1  | 74 | 3.608360489 | 3.3 | 0 |
| 2016/11/23 | -5.2 | 52 | 1.743402666 | 5.5 | 0 |
| 2016/11/24 | -3.5 | 49 | 1.856091368 | 2.1 | 0 |
| 2016/11/25 | -2   | 58 | 2.443144326 | 2.7 | 0 |
| 2016/11/26 | 0.6  | 50 | 2.523541969 | 3.3 | 0 |
| 2016/11/27 | 3.6  | 78 | 4.825761107 | 3.5 | 0 |
| 2016/11/28 | 1.8  | 69 | 3.780386842 | 4.4 | 0 |
| 2016/11/29 | -0.8 | 66 | 3.023609643 | 4.3 | 0 |
| 2016/11/30 | -0.5 | 59 | 2.759875592 | 3.3 | 1 |
| 2016/12/1  | 5.8  | 69 | 4.940155031 | 5.1 | 0 |
| 2016/12/2  | 1.1  | 64 | 3.342859989 | 4.6 | 0 |
| 2016/12/3  | 3.6  | 45 | 2.784092947 | 3.1 | 0 |
| 2016/12/4  | 7.1  | 67 | 5.222625079 | 4   | 0 |
| 2016/12/5  | 6.3  | 74 | 5.47485054  | 3.4 | 0 |
| 2016/12/6  | -2.1 | 77 | 3.220743749 | 5.4 | 0 |
| 2016/12/7  | -5   | 51 | 1.734771718 | 3.7 | 0 |
| 2016/12/8  | -2.5 | 66 | 2.68385997  | 1.5 | 0 |
| 2016/12/9  | -0.3 | 86 | 4.079058811 | 1.9 | 0 |
| 2016/12/10 | -2.6 | 82 | 3.311011352 | 4.1 | 0 |
| 2016/12/11 | -4.6 | 71 | 2.485723253 | 5.5 | 0 |
| 2016/12/12 | -4.1 | 72 | 2.612868669 | 1.9 | 0 |
| 2016/12/13 | 0.2  | 74 | 3.633352847 | 3.4 | 0 |
| 2016/12/14 | -2   | 76 | 3.201361531 | 1.5 | 0 |

|            |      |    |             |     |   |
|------------|------|----|-------------|-----|---|
| 2016/12/15 | -4.5 | 71 | 2.503666173 | 2.2 | 0 |
| 2016/12/16 | -5.3 | 74 | 2.463105459 | 1.7 | 0 |
| 2016/12/17 | -3.6 | 62 | 2.331840085 | 3.4 | 0 |
| 2016/12/18 | 1    | 64 | 3.320043712 | 2.8 | 0 |
| 2016/12/19 | 1    | 61 | 3.164416663 | 2.4 | 0 |
| 2016/12/20 | -0.1 | 68 | 3.270272842 | 2.4 | 1 |
| 2016/12/21 | 2.7  | 65 | 3.78524952  | 3.1 | 0 |
| 2016/12/22 | 0.3  | 85 | 4.202326962 | 1.6 | 0 |
| 2016/12/23 | -1.4 | 88 | 3.866178295 | 3.1 | 0 |
| 2016/12/24 | -4.4 | 60 | 2.131033167 | 2.8 | 0 |
| 2016/12/25 | -2.3 | 62 | 2.557041279 | 2.7 | 0 |
| 2016/12/26 | 1.3  | 77 | 4.077275001 | 3.8 | 0 |
| 2016/12/27 | -2.5 | 70 | 2.84651815  | 3.2 | 0 |
| 2016/12/28 | -6.4 | 64 | 1.96640283  | 2.1 | 0 |
| 2016/12/29 | -3.6 | 66 | 2.482281381 | 4.6 | 0 |
| 2016/12/30 | -2.8 | 58 | 2.309024418 | 2.7 | 0 |
| 2016/12/31 | -2.6 | 64 | 2.584203982 | 3.6 | 0 |

**Table S2.** Background demographic characteristics, date of sampling and admitted ward of cases.

| Date of sampling | Bacterium           | Age | Sex | Ward                  |
|------------------|---------------------|-----|-----|-----------------------|
| 2011/1/14        | Bacillus cereus     | 45  | F   | Gynecology            |
| 2011/6/14        | Bacillus subtilis   | 80  | F   | Hematology            |
| 2011/6/27        | Bacillus subtilis   | 69  | M   | Respiratory medicine  |
| 2012/3/15        | Bacillus cereus     | 52  | F   | Mammal surgery        |
| 2012/3/27        | Bacillus cereus     | 62  | F   | Gynecology            |
| 2012/8/6         | Bacillus subtilis   | 47  | F   | Urology               |
| 2012/8/11        | Bacillus cereus     | 82  | F   | Hematology            |
| 2012/11/5        | Bacillus cereus     | 84  | M   | Gastroenterology      |
| 2012/12/23       | Bacillus cereus     | 71  | M   | Respiratory medicine  |
| 2013/5/6         | Bacillus species    | 79  | F   | Urology               |
| 2013/7/2         | Bacillus cereus     | 72  | M   | Urology               |
| 2013/8/23        | Bacillus cereus     | 65  | M   | Urology               |
| 2013/8/31        | Bacillus cereus     | 14  | F   | Ongology              |
| 2013/9/21        | Bacillus cereus     | 57  | F   | Gynecology            |
| 2013/10/3        | Bacillus cereus     | 60  | M   | Urology               |
| 2013/10/15       | Bacillus cereus     | 90  | M   | Urology               |
| 2013/10/24       | Bacillus cereus     | 72  | M   | Gastroenterology      |
| 2014/2/7         | Bacillus megaterium | 69  | M   | Urology               |
| 2014/2/28        | Bacillus cereus     | 64  | M   | Gastroenterology      |
| 2014/4/13        | Bacillus cereus     | 58  | M   | Head and neck surgery |
| 2014/4/21        | Bacillus cereus     | 53  | F   | Hematology            |
| 2014/7/25        | Bacillus cereus     | 55  | F   | Gynecology            |
| 2014/7/28        | Bacillus cereus     | 59  | M   | Urology               |
| 2014/8/1         | Bacillus cereus     | 78  | F   | Hematology            |
| 2014/8/5         | Bacillus cereus     | 61  | F   | Gynecology            |
| 2014/9/2         | Bacillus cereus     | 48  | F   | Gastroenterology      |
| 2014/10/8        | Bacillus cereus     | 81  | M   | Urology               |
| 2014/11/13       | Bacillus cereus     | 65  | M   | Respiratory medicine  |

|            |                     |    |   |                      |
|------------|---------------------|----|---|----------------------|
| 2014/11/24 | Bacillus subtilis   | 53 | F | Gastroenterology     |
| 2014/12/20 | Bacillus cereus     | 22 | M | Ongology             |
| 2015/4/22  | Bacillus cereus     | 78 | M | Respiratory medicine |
| 2015/4/28  | Bacillus cereus     | 50 | F | Gynecology           |
| 2015/5/28  | Bacillus species    | 69 | M | Hematology           |
| 2015/6/5   | Bacillus species    | 56 | F | Mammal surgery       |
| 2015/6/7   | Bacillus cereus     | 54 | F | Mammal surgery       |
| 2015/6/12  | Bacillus cereus     | 72 | F | Respiratory medicine |
| 2015/6/24  | Bacillus megaterium | 64 | M | Hematology           |
| 2015/6/28  | Bacillus cereus     | 59 | M | Ongology             |
| 2015/9/1   | Bacillus cereus     | 69 | M | Respiratory medicine |
| 2015/12/8  | Bacillus cereus     | 72 | M | Urology              |
| 2016/1/26  | Bacillus cereus     | 77 | F | Respiratory medicine |
| 2016/4/12  | Bacillus cereus     | 62 | M | Gastroenterology     |
| 2016/6/3   | Bacillus species    | 72 | F | Respiratory medicine |
| 2016/6/3   | Bacillus cereus     | 63 | F | Gastroenterology     |
| 2016/7/8   | Bacillus cereus     | 67 | F | Hematology           |
| 2016/7/19  | Bacillus cereus     | 47 | F | Mammal surgery       |
| 2016/8/2   | Bacillus cereus     | 75 | F | Gastroenterology     |
| 2016/8/24  | Bacillus cereus     | 68 | M | Ongology             |
| 2016/8/26  | Bacillus cereus     | 53 | F | Gastroenterology     |
| 2016/10/23 | Bacillus cereus     | 73 | F | Mammal surgery       |
| 2016/11/30 | Bacillus cereus     | 71 | F | Gynecology           |
| 2016/12/20 | Bacillus cereus     | 31 | F | Gastroenterology     |

---
